# Supplementary material for: Quantifying Anticholinergic Burden and Sedative Load in Older Adults with Polypharmacy: A Systematic Review of Risk Scales and Models
Source: PubMed Central journal article supplement — Drugs Aging. 2021 Nov 9;38(11):977–94. doi: 10.1007/s40266-021-00895-x (PMC8592980; doi:10.1007/s40266-021-00895-x), 2021-11-09
Supplement: 40266_2021_895_MOESM1_ESM.pdf [file 40266_2021_895_MOESM1_ESM.pdf]

**Quantifying Anticholinergic Burden and Sedative Load in Older Adults with Polypharmacy: A Systematic Review of Risk Scales and Models.**

Sweilem B. Al Rihani, PharmD, PhD<sup>1</sup>, Malavika Deodhar, PhD<sup>1</sup>, Lucy I Darakjian, Pharm D, PhD<sup>1</sup>, Pamela Dow, MS<sup>1</sup>, Matt K Smith, PhD<sup>1</sup>, Ravil Bikmetov, PhD<sup>1</sup>, Jacques Turgeon, BPharm, PhD<sup>1,2</sup>, and Veronique Michaud, BPharm, PhD<sup>1,2</sup>

<sup>1</sup>Tabula Rasa HealthCare, Precision Pharmacotherapy Research and Development Institute, Orlando, FL USA

<sup>2</sup>Université de Montréal, Faculty of Pharmacy. Montreal, Quebec Canada

Corresponding Author: Veronique Michaud

13485 Veteran's Way, Suite 410

Orlando, FL 32827

[vmichaud@trhc.com](mailto:vmichaud@trhc.com)

Supplementary Text S1

- 1. Anticholinergic Drug Scale (ADS):** The ADS was developed in the U.S. in 2006. It is a 4-point scale (0–3) based on expert opinion and modification of the Clinician-rated Anticholinergic Scale (CrAS) developed based on experts' clinical experience and knowledge of the medication's properties.[1] A score of 0 indicates no known anticholinergic properties, while 1, 2, and 3 indicate drug have potentially anticholinergic, have occurrences of anticholinergic adverse events (usually at excessive doses), and are markedly anticholinergic, respectively. The scale includes a total of 520 drugs (403 drugs with 'no anticholinergic activity' score of 0) and with consideration of dose. The scale was developed through a cross-sectional observational study among older adults' patients in long-term care facilities. The ADS scale has been widely used and validated in populations of long-term care residents, hospital inpatients, nursing home residents, outpatient community residents and Australian veterans. It has been used to investigate associations between anticholinergic use and specific adverse events [2, 3]. This scale was first known as the CrAS modified version and the name was changed to ADS [3]. The adverse anticholinergic outcomes reported in these settings were cognitive dysfunction, risk of hospitalization, and mortality [4-6]. While the ADS reported a high number of medications, 117 drugs only showed anticholinergic activity and the remaining were classified as "No activity score" with a score of 0.
- 2. Anticholinergic Burden Classification (ABC):** The ABC was developed in France in 2006. It is a 4-point scale (0–3) based on expert opinion and extensive literature review of medications properties, available studies associating drugs with their serum anticholinergic activity through radioreceptor assays, route of administration, potential drug interaction effects and potential blood-brain barrier permeability. It includes a total of 27 medications with anticholinergic activity, without consideration of dose. The original publication includes drugs scored 2 and 3 on the ABC scale. The scale was developed through a longitudinal study in an outpatient population of older adults aged >60 years without senile dementia at baseline through 63 randomly selected general practitioners in France. The ABC scale was used to examine the associations between use of anticholinergic drugs and cognitive impairment in older adults and has been validated as described in Table S4 [7]. Patient drug burden was classified as 0 if they took no anticholinergic drugs, 1 if they took drugs with no likely effect, 2 if patient took drugs with low anticholinergic effect, and 3 if patient took drugs with high anticholinergic effect.
- 3. Anticholinergic Risk Scale (ARS):** The ARS was developed in the U.S. in 2008. It is a 4-point scale (0–3) based on expert opinion and extensive literature review of the 500 most prescribed medications within the Veterans Affairs Boston Healthcare System for their affinity for the muscarinic receptor, experimental reporting of anticholinergic activity, and literature review on anticholinergic adverse effects. The ARS includes 49 medications with consideration of dose. A score of 0 indicates no or limited anticholinergic potential and those drugs were not reported in the final ARS table, while 1, 2, and 3 indicate moderate, strong, and very strong anticholinergic potential, respectively. The scale was developed through 2 cohorts, retrospective cohort and a prospective cohort both included older adults. It has been validated in various populations of hospital patients, community dwelling patients, and veterans. It has been used to evaluate the associations between anticholinergic use and cognitive dysfunction or other anticholinergic adverse events [8].
- 4. Anticholinergic Cognitive Burden (ACB) scale:** The ACB scale was developed in the U.S. in 2008. It is a 3-point scale (1–3) based on literature review and expert opinion. It includes a total of 88 medications but with no consideration of dose. A score of 1 indicates drugs with possible anticholinergic effects (as demonstrated by serum anticholinergic activity or *in vitro* affinity to muscarinic receptor) but with no clinically relevant cognitive effects, while 2 or 3 indicate drugs with established, clinically relevant cognitive effects based on the drug blood-brain barrier permeability and its association with delirium. The scale was developed among a cohort of older adults attending primary care in Indianapolis, USA. The ACB has been widely used as is or with modifications based on the country and has been validated in a wide range of populations of older adults of different age-groups, with and without dementia, and who were receiving care in long-term care residents, hospital inpatients, nursing home residents, outpatient community residents. It has been used to investigate associations between anticholinergic use and specific adverse events [3, 9, 10].
- 5. [1]Anticholinergic Activity Scale (AAS):** The AAS was developed in Norway in 2010. It is a 5-point scale (0–4) based on modifying the descriptive categorical score described in Chew's list of 107 drugs with measured anticholinergic activity and on expert opinion [11, 12]. It includes a total of 99 medications but with no consideration of dose. A score of 0 indicates no anticholinergic activity; while 1 indicate none or minimal anticholinergic activity, 2, 3 and 4 indicates 0.5–5pmol/mL, 5–15pmol/mL, and >15pmol/mL of serum anticholinergic activity, respectively. The AAS scale was developed in a longitudinal community cohort of Parkinson's disease patients. It was used to evaluate the associations between anticholinergic use and cognitive dysfunction in this patient population but the scale has been validated as described in Table S4 [12].
- 6. Anticholinergic Loading Scale (ACL/ALS):** The ACL was developed in Australia in 2011. It is a 4-point scale (0–3) based on methods for calculation of anticholinergic load described in the ABC scale, the clinician-rated anticholinergic scores (CrAS). The authors used the previously published anticholinergic score for a medication and transformed to an ordinal scale (0-3) and expert opinion for any medication that has not been classified previously. The ACL includes a total of 292 medications with no consideration of dose. A score of 0 indicates no anticholinergic effect, and a score of 1,2 and 3 indicates low, moderate and strong anticholinergic effect respectively. The scale was developed through a multidisciplinary longitudinal study of aging, integrating expertise in neuroimaging,

biomarkers, clinical and neuropsychological research and lifestyle of older adults' participants of the Australian Imaging, Biomarkers and Lifestyle study of individuals. It was used to evaluate the associations between anticholinergic use and cognitive dysfunction and has been validated as described in Table S4 [13].

7. **Anticholinergic effect on cognition (AEC):** The AEC was developed in the United Kingdom in 2016. It is a 4-point scale (0-3) based on a transparent and systematic evidence-based approach reviewing all British National Formulary (BNF) drug categories commonly used in older people for their *in-vitro* anticholinergic potency, capacity to cross the blood brain barrier and statements made in standard texts reviewed. A total of 165 drugs were examined and were able to classify 122 drugs without consideration of the dose, while 46 drugs were removed due to insufficient information. Individual drugs are ranked on their individual properties, so that different drugs from the same class may be allocated different AEC scores [14]. The scale has been recently validated in a retrospective study of patients with dementia using anonymized mental health records linked with mortality and hospitalization data [15].
8. **German Anticholinergic Burden Scale (German ACB):** This scale was developed in Germany in 2018. It is a 4-point scale (0–3) based on expert opinion and literature review that included 504 drugs approved in Germany without consideration of dose. A score of 0 indicates no anticholinergic potential, while 1, 2, and 3 indicate low, moderate, and high anticholinergic potential, respectively[16]. The German ACB has been recently validated in a multicentered observational cohort study in Germany and was compared with the ADS scale. The study found that increasing German ACB and ADS and was associated with reduced cognitive function, the German ACB generated comparable outcomes with the ADS score.[17]
9. **Brazilian anticholinergic activity drug scale:** This scale was developed in Brazil in 2019. It is a 3-point scale (1–3) based on expert opinion and literature review that considers 125 drugs approved in Brazil, with at least some anticholinergic activity and without consideration of the dose. The validation of this scale in different healthcare settings have not been done yet [18].
10. **Korean Anticholinergic Burden Scale (KABS):** The KABS was developed in Korea in 2019. It is a 4-point scale (0–3) based on expert opinion and literature review that generated a composite list of 655 medications with anticholinergic scores extracted from 10 existing scales and additional medications not rated previously and available in Korea were added to the list. A final list of 494 medications were deemed suitable for a Korean-specific scale without consideration of dose. A score of 0 indicates no anticholinergic potential, while 1, 2, and 3 indicate low, moderate, and high anticholinergic potential, respectively [19]. The KABS has been recently validated as described in Table S4.
11. **Modified anticholinergic burden scale (mACB):** The mACB scale was developed in Australia in 2019 based on modifying the original ACB scale developed by the Aging Brain Program of the Indiana Center for Aging Research ACB scale and Anticholinergic Risk Scale (ARS). The following approach for the modifications; first when a drug had different scores in the two scales used, the higher score was assigned. When a drug was only listed in one scale then the score for that scale was used. The modifications in this scale include only medications approved and in current use in Australia. It is as 3-point scale (1–3) that included a total of 82 drugs without consideration of the dose. The scale was developed and validated in a prospective quasi-experimental pre/post-controlled trial in sample population of 277 participants with dementia or cognitive impairment in Australia but the results are still under peer-review [20, 21].
12. **Sedative Load Model:** Published in 2003, the Sedative Load Model (SLM) was the first attempt to present a detailed classification of the sedative effects of drugs [22]. The model was developed by reviewing the product characteristics summary for all available drugs in Finland from 1998 to 2001 [23, 24]. Medications were categorized by a team of experts as: primary sedatives (group 1; scored 2), drugs with sedation as a prominent side effect (group 2; scored 1), drugs with sedation as a potential side effect (group 3; scored 0), and drugs with no sedative effect (group 4; scored 0) [23]. The SLM model has been extensively utilized and validated as described in Table S4.
13. **Sloane Model:** The Sloane Model has been derived from the SLM scale. Modifications to the SLM were introduced by Sloane *et al.* in 2008 for drugs used in their clinical trial [25]. First, drugs were scored from 0 to 6 (instead of 0-2) and reclassified to include only benzodiazepines, diphenhydramine, phenelzine, molindone, and chloral hydrate in group 1, with the highest score set at 6. All other drugs from Sloane's group 1 (*e.g.*, amitriptyline, amoxapine, desipramine, doxepin and imipramine) were moved to group 2, with a score of 3. Drugs with sedation as a potential side effect were assigned a score of 1 (group 3), whereas drugs with no sedation were scored 0 (group 4) [25]. The sedative Sloane model has not been validated yet; few studies validated the Sloane analgesic model.[26, 27]

Supplementary Table S1 Quality assessment scores for included papers (n=13)

| Model/ Scale                                                                                                                                                                                                                                                                                                                                                                                           | Abstract and Title | Intro and Aims | Methods and Data | Sampling | Data analysis | Ethics and Bias | Findings and Results | Transferability and Reliability | Implications and Usefulness | SUM/36 |
|--------------------------------------------------------------------------------------------------------------------------------------------------------------------------------------------------------------------------------------------------------------------------------------------------------------------------------------------------------------------------------------------------------|--------------------|----------------|------------------|----------|---------------|-----------------|----------------------|---------------------------------|-----------------------------|--------|
| <i>Sedative</i>                                                                                                                                                                                                                                                                                                                                                                                        |                    |                |                  |          |               |                 |                      |                                 |                             |        |
| SLM                                                                                                                                                                                                                                                                                                                                                                                                    | 4                  | 2              | 4                | 4        | 3             | 1               | 4                    | 4                               | 4                           | 30/36  |
| Sloane model                                                                                                                                                                                                                                                                                                                                                                                           | 4                  | 4              | 4                | 4        | 4             | 1               | 4                    | 4                               | 4                           | 33/36  |
| <i>Anticholinergic</i>                                                                                                                                                                                                                                                                                                                                                                                 |                    |                |                  |          |               |                 |                      |                                 |                             |        |
| AAS scale                                                                                                                                                                                                                                                                                                                                                                                              | 4                  | 4              | 4                | 4        | 4             | 4               | 4                    | 3                               | 4                           | 35/36  |
| ABC scale                                                                                                                                                                                                                                                                                                                                                                                              | 4                  | 4              | 4                | 4        | 3             | 4               | 4                    | 3                               | 4                           | 34/36  |
| ACB scale                                                                                                                                                                                                                                                                                                                                                                                              | 3                  | 4              | 3                | 3        | 4             | 1               | 3                    | 4                               | 4                           | 29/36  |
| mACB scale                                                                                                                                                                                                                                                                                                                                                                                             | 3                  | 4              | 4                | 4        | 4             | 4               | 4                    | 3                               | 4                           | 34/36  |
| ADS scale                                                                                                                                                                                                                                                                                                                                                                                              | 4                  | 2              | 4                | 4        | 4             | 1               | 4                    | 4                               | 4                           | 31/36  |
| ARS scale                                                                                                                                                                                                                                                                                                                                                                                              | 4                  | 4              | 4                | 4        | 4             | 1               | 4                    | 4                               | 4                           | 33/36  |
| ARS/ACL scale                                                                                                                                                                                                                                                                                                                                                                                          | 4                  | 4              | 4                | 4        | 4             | 4               | 4                    | 3                               | 4                           | 35/36  |
| KABS scale                                                                                                                                                                                                                                                                                                                                                                                             | 4                  | 4              | 4                | 3        | 4             | 4               | 4                    | 4                               | 4                           | 35/36  |
| German ACB scale                                                                                                                                                                                                                                                                                                                                                                                       | 4                  | 4              | 4                | 4        | 3             | 4               | 3                    | 3                               | 4                           | 33/36  |
| Brazilian scale                                                                                                                                                                                                                                                                                                                                                                                        | 4                  | 4              | 4                | 3        | 3             | 1               | 3                    | 4                               | 3                           | 29/36  |
| AEC scale                                                                                                                                                                                                                                                                                                                                                                                              | 4                  | 4              | 4                | 3        | 2             | 1               | 4                    | 4                               | 4                           | 30/36  |
| Key: ADS: Anticholinergic Drug Scale; ABC: Anticholinergic Burden Classification; ARS: Anticholinergic Rating Scale; ACB: Anticholinergic Cognitive Burden; AAS: Anticholinergic Activity Scale; ALS: Anticholinergic Load Scale; AEC: Anticholinergic Effect on Cognition, KABS: Korean Anticholinergic Burden Scale, mACB: modified Anticholinergic Cognitive Burden scale, SLM: Sedative Load Model |                    |                |                  |          |               |                 |                      |                                 |                             |        |

**Supplementary Table S2. The AntiCholinergic and Sedative Burden Catalog (ACSBC): a cumulative review table to classify medications for their anticholinergic and sedative properties (N = 642)**

| Drug Name                      | Anticholinergic Activity               | Sedative Activity | FDA Approved | Drug Name                 | Anticholinergic Activity               | Sedative Activity | FDA Approved | Drug Name                | Anticholinergic Activity    | Sedative Activity | FDA Approved |
|--------------------------------|----------------------------------------|-------------------|--------------|---------------------------|----------------------------------------|-------------------|--------------|--------------------------|-----------------------------|-------------------|--------------|
| Abemaciclib                    | No*                                    | Low [22]          | Yes          | Atorvastatin              | No [2, 16, 19]                         | Low [22]          | Yes          | Butalbital               | No [2]                      | High [22]         | Yes          |
| Acamprosate                    | No*                                    | Low [22]          | Yes          | Atovaquone                | No*                                    | Low [22]          | Yes          | Cabergoline              | No [16]                     | Low [22]          | Yes          |
| Acarbose                       | No [2, 16, 19]                         | No*               | Yes          | Atropine                  | High [8, 13, 18, 19, 29, 31-33]        | Moderate [25]     | Yes          | Caffeine                 | No [2, 19]                  | No*               | Yes          |
| Acetaminophen                  | No [2, 19]                             | No [22]           | Yes          | Axitinib                  | No*                                    | Low [22]          | Yes          | Calamine, Topical        | No [2]                      | No*               | Yes          |
| Acetazolamide                  | No [2, 16, 19]                         | Low [22]          | Yes          | Azathioprine              | Low [2, 16, 18, 31, 34]                | No*               | Yes          | Calcipotriene, Topical   | No [2]                      | No*               | Yes          |
| Acetylsalicylic Acid / Aspirin | No [2, 16, 19]                         | No [22]           | Yes          | Azithromycin              | No [2, 16, 19]                         | No*               | Yes          | Calcitriol               | No [2, 16, 19]              | Low*              | Yes          |
| Acitretin                      | No [16, 19]                            | No*               | Yes          | Bacitracin                | No [2]                                 | No*               | Yes          | Calcium                  | No [2, 16, 19]              | No*               | Yes          |
| Acrivastine                    | No*                                    | Low [22]          | DXD          | Baclofen                  | Moderate [3, 8, 18, 29, 31, 32, 34-36] | Moderate [22]     | Yes          | Camphor-Menthol, Topical | No [2]                      | No*               | Yes          |
| Activated Charcoal             | No [16, 19]                            | No*               | Yes          | Beclomethasone            | No*                                    | No [22]           | Yes          | Candesartan (cilexetil)  | No [2, 16, 19]              | Low [22]          | Yes          |
| Acylovir                       | No [2, 16, 19]                         | No*               | Yes          | Benazepril                | No [2, 19]                             | Low [22]          | Yes          | Cannabidiol              | No*                         | Moderate [22]     | Yes          |
| Afatinib                       | No*                                    | Low [22]          | Yes          | Benzatropine/ Benztropine | High [2, 8, 10, 13, 18, 19]            | Moderate [22, 25] | Yes          | Capecitabine             | Low*                        | Low [22]          | Yes          |
| Albuterol                      | No [2]                                 | No*               | Yes          | Benzonatate               | No [2, 19]                             | Moderate*         | Yes          | Captopril                | Low [2, 10, 16, 18, 31, 34] | Low [22]          | Yes          |
| Alectinib                      | No*                                    | Low [22]          | Yes          | Bepotastine               | No [19]                                | No [37]           | Yes          | Carbamazepine            | Low [11, 12, 29, 33]        | Moderate [22]     | Yes          |
| Alendronate                    | No                                     | No*               | Yes          | Betaine                   | No [16, 19]                            | No*               | Yes          | Carbidopa                | Low [8, 13, 18, 29, 31]     | Low [22]          | Yes          |
| Alitretinoin (isotretinoin)    | No*                                    | Low*              | Yes          | Betamethasone             | No [2, 16]                             | No [22]           | Yes          | Carbinoxamine            | High [2, 3, 10, 18, 19]     | Moderate [22]     | Yes          |
| Allopurinol                    | No                                     | Low*              | Yes          | Betaxolol                 | Low [16, 29, 34]                       | Low [22]          | Yes          | Cariprazine              | No*                         | Moderate [22]     | Yes          |
| Almotriptan                    | Low*                                   | Moderate*         | Yes          | Bethanechol               | No [2, 16, 19]                         | No*               | Yes          | Carisoprodol             | High [3, 8, 18]             | Moderate [22]     | Yes          |
| Alprazolam                     | Low [2, 10, 13, 29]                    | High [22]         | Yes          | Bexarotene                | No*                                    | Low [22]          | Yes          | Carmellose Sodium        | No [16]                     | No*               | No           |
| Aluminum Hydroxide             | No [2, 16, 19]                         | No*               | Yes          | Bicalutamide              | No [2, 16, 19]                         | No*               | Yes          | Carnitine                | No [16, 19]                 | No*               | Yes          |
| Amantadine                     | Moderate [8, 10, 13]                   | Low [22]          | Yes          | Bimatoprost               | No [16]                                | No*               | Yes          | Carvedilol               | No [2, 16, 19]              | Low [22]          | Yes          |
| Amiloride                      | No [2, 16, 19]                         | Low [22]          | Yes          | Binimetinib               | No*                                    | Low [22]          | Yes          | Castol Oil               | No [2, 16]                  | No*               | Yes          |
| Amiodarone                     | No [2, 16, 19]                         | No*               | Yes          | Bisacodyl                 | No [2, 19]                             | No*               | Yes          | Cefaclor                 | No [2, 16, 19]              | Low [22]          | Yes          |
| Amitriptyline                  | High [2, 7, 8, 10, 12, 13, 16, 19, 29] | High [22]         | Yes          | Bismuth Subsalicylate     | No [2]                                 | No*               | Yes          | Cefadroxil               | No*                         | Low [22]          | Yes          |
| Amlodipine                     | No [2, 16, 19]                         | Low [22]          | Yes          | Bisoprolol                | No [2, 16, 19]                         | Low [22]          | Yes          | Cefixime                 | No [2, 16, 19]              | Low [22]          | Yes          |
| Ammonium                       | No [2]                                 | No*               | Yes          | Bosutinib                 | No*                                    | Low [22]          | Yes          | Ceftibuten               | No [2, 16, 19]              | Low [22]          | DXD          |
| Amoxapine                      | High [7, 10, 19]                       | Moderate [22, 25] | Yes          | Brigatinib                | No*                                    | Low [22]          | Yes          | Ceftriaxone              | No [2, 16, 19]              | Low [22]          | Yes          |
| Amoxicillin                    | No [2, 16, 19]                         | No*               | Yes          | Brivaracetam              | No*                                    | Moderate [22]     | Yes          | Cefuroxime               | No [2, 16, 19]              | Low [22]          | Yes          |
| Amoxicillin-Clavulanate        | No                                     | No*               | Yes          | Bromhexine                | No [16, 19]                            | Moderate [22]     | No           | Celecoxib                | Low [13, 16, 34]            | Low [22]          | Yes          |
| Ampicillin                     | Low [2, 16, 18, 30, 31]                | No*               | Yes          | Bromocriptine             | Low [2, 16, 34]                        | Low [22]          | Yes          | Cephalexin               | No [2, 16, 19]              | Low [22]          | Yes          |
| Anagrelide                     | No [2, 16, 19]                         | Low [22]          | Yes          | Brompheniramine           | High [2, 3, 10, 18, 19, 32, 35, 36]    | Moderate [22]     | Yes          | Ceritinib                | No*                         | Low [22]          | Yes          |
| Anastrozole                    | No [2, 19]                             | No*               | Yes          | Budesonide                | No [2, 16]                             | No [22]           | Yes          | Cetirizine               | Moderate [8, 13, 29]        | Low [22]          | Yes          |
| Apixaban                       | No [16]                                | No*               | Yes          | Bumetanide                | No [2]                                 | Low [38]          | Yes          | Cetylpyridinium          | No [2]                      | No*               | No           |
| Apraclonidine                  | No*                                    | No*               | Yes          | Buprenorphine             | Low [16, 19]                           | Moderate [22]     | Yes          | Chlorambucil             | No [2, 16, 19]              | No*               | Yes          |
| Aripiprazole                   | Low [10, 16, 19]                       | Moderate [25]     | Yes          | Bupropion                 | Low [10, 16, 18, 19, 29, 31, 34]       | Moderate [25]     | Yes          | Chloramphenicol          | No [16]                     | No*               | Yes          |
| Artemether                     | No*                                    | Low [22]          | Yes          | Buspirone                 | No [2, 16, 19]                         | Moderate [22]     | Yes          | Chlordiazepoxide         | Low [2, 16, 19, 29]         | High [25]         | Yes          |
| Ascorbic Acid                  | No [2, 16, 19]                         | No*               | Yes          | Butabarbital              | No [2]                                 | High [22]         | DXD          | Chlorhexidine            | No [2]                      | No*               | Yes          |
| Asenapine                      | Low [10, 16]                           | Moderate [22]     | Yes          |                           |                                        |                   |              | Chloroquine              | Low*                        | Low [22]          | Yes          |
| Atenolol                       | Low [10]                               | Low [22]          | Yes          |                           |                                        |                   |              | Chlorothiazide           | No [2, 16, 34]              | Low [22]          | Yes          |

Running head: Quantifying Anticholinergic Burden and Sedative Load

| Drug Name                        | Anticholinergic Activity                                  | Sedative Activity | FDA Approved |
|----------------------------------|-----------------------------------------------------------|-------------------|--------------|
| Chlorphenamine/ Chlorpheniramine | High [2, 3, 7, 8, 10, 13, 16, 18, 19, 29, 32, 33, 35, 36] | Moderate [22]     | Yes          |
| Chlorpromazine                   | High [2, 10, 19]                                          | Moderate [25]     | Yes          |
| Chlorthalidone/ Chlortalidone    | Low [2, 10, 16, 18, 20, 31]                               | No*               | Yes          |
| Chlorzoxazone                    | No [2, 19]                                                | Low*              | Yes          |
| Cholestyramine                   | No [2, 16, 19]                                            | No*               | Yes          |
| Cilostazol                       | No [2, 16, 19]                                            | Low*              | Yes          |
| Cimetidine                       | Moderate*                                                 | Low [22]          | Yes          |
| Ciprofloxacin                    | No [2, 16, 19]                                            | Low [22]          | Yes          |
| Citalopram                       | Low*                                                      | Moderate [22]     | Yes          |
| Clarithromycin                   | No [2, 16, 19]                                            | No*               | Yes          |
| Clemastine                       | High [2, 3, 10, 16, 18, 19, 32, 35, 36]                   | Moderate [22]     | Yes          |
| Clidinium                        | Low*                                                      | Moderate [22]     | Yes          |
| Clindamycin                      | Low [2, 16]                                               | No*               | Yes          |
| Clobazam                         | No [2, 16, 19]                                            | High [22]         | Yes          |
| Clomipramine                     | High [2, 3, 7, 10, 16, 18, 19]                            | High [22]         | Yes          |
| Clonazepam                       | Low [2, 13, 16, 18, 19, 31]                               | High [25]         | Yes          |
| Clonidine                        | No [2, 16, 19]                                            | Low [25]          | Yes          |
| Clopidogrel                      | No [2, 16, 19]                                            | No*               | Yes          |
| Clorazepate                      | Low [2, 10]                                               | High [25]         | Yes          |
| Clotrimazole                     | No [2, 16]                                                | No*               | Yes          |
| Clozapine                        | High [10, 16, 18-20]                                      | Moderate [22]     | Yes          |
| Cobimetinib                      | No*                                                       | Low [22]          | Yes          |
| Codeine                          | Low [10]                                                  | Moderate [22]     | Yes          |
| Colchicine                       | Low [2, 16, 19]                                           | No*               | Yes          |
| Colestipol                       | No [2]                                                    | No*               | Yes          |
| Collagenase                      | No [2]                                                    | No*               | Yes          |
| Crizotinib                       | No*                                                       | Low [22]          | Yes          |
| Cromolyn                         | No[2]                                                     | No*               | Yes          |
| Cyclobenzaprine                  | Moderate [2, 8, 10]                                       | Moderate [22]     | Yes          |
| Cyclophosphamide                 | No [2, 16, 19]                                            | Low [22]          | Yes          |
| Cycloserine                      | Low [2]                                                   | No*               | Yes          |
| Cyclosporine                     | Low [2, 16, 31]                                           | No*               | Yes          |
| Cyproheptadine                   | High*                                                     | Moderate [22]     | Yes          |
| Dabigatran                       | No [16]                                                   | No*               | Yes          |
| Dabrafenib                       | No*                                                       | Low [22]          | Yes          |
| Dacomitinib                      | No*                                                       | Low [22]          | Yes          |
| Danazol                          | No [2, 19]                                                | No*               | Yes          |

| Drug Name           | Anticholinergic Activity                          | Sedative Activity | FDA Approved |
|---------------------|---------------------------------------------------|-------------------|--------------|
| Dantrolene          | No [2, 16, 19]                                    | Moderate*         | Yes          |
| Darifenacin         | High*                                             | Low [22]          | Yes          |
| Dasatinib           | No*                                               | Low [22]          | Yes          |
| Deferasirox         | No [16, 19]                                       | No*               | Yes          |
| Delafloxacin        | No*                                               | Low [22]          | Yes          |
| Demeclocycline      | No [2]                                            | No [22]           | Yes          |
| Desipramine         | High [2, 10]                                      | High [22]         | Yes          |
| Desloratadine       | Low [3, 10, 16, 18-20, 36]                        | Low [22]          | Yes          |
| Desmopressin        | No [2, 16, 19]                                    | Low*              | Yes          |
| Desonide            | No [2]                                            | No [22]           | Yes          |
| Desoximetasone      | No [2]                                            | No [22]           | Yes          |
| Desvenlafaxine      | Moderate [39]                                     | Moderate [22]     | Yes          |
| Dexamethasone       | Low [2, 16, 18, 31]                               | No [22]           | Yes          |
| Dexchlorpheniramine | High [3, 10, 13, 18, 19, 31-33, 35, 36]           | Moderate[22]      | Yes          |
| Dexlansoprazole     | No*                                               | Low [22]          | Yes          |
| Dextromethorphan    | Low [16, 19, 29],                                 | Moderate [25]     | Yes          |
| Diazepam            | Low [2, 10, 12, 13, 29]                           | High [22]         | Yes          |
| Diclofenac          | No [2, 16]                                        | Low [22]          | Yes          |
| Dicyclomine         | High [2, 8, 10, 16]                               | Moderate[22]      | Yes          |
| Diffunisal          | No [2]                                            | No*               | Yes          |
| Digoxin             | Low*                                              | No [22]           | Yes          |
| Dihydrocodeine      | No*                                               | Moderate [22]     | Yes          |
| Diltiazem           | Low [2, 16, 18, 31]                               | Low [22]          | Yes          |
| Dimenhydrinate      | High [2, 3, 10, 16, 18, 19, 31]                   | Moderate[22]      | Yes          |
| Diphenhydramine     | High [2, 3, 8, 10, 16, 18, 19, 29, 31-33, 35, 36] | High [25]         | Yes          |
| Diphenoxylate       | No [2]                                            | Moderate [25]     | Yes          |
| Dipyridamole        | Low [2, 10, 16, 18-20]                            | No [22]           | Yes          |
| Disopyramide        | Moderate [2]                                      | No*               | Yes          |
| Disulfiram          | No*                                               | Low [22]          | Yes          |
| Divalproex sodium   | Low [2]                                           | Moderate [22]     | Yes          |
| Dobutamine          | No [2, 16, 19]                                    | No*               | Yes          |
| Docusate            | No [2, 16, 19]                                    | No*               | Yes          |
| Donepezil           | No [2, 16, 19]                                    | Low [22]          | Yes          |
| Dopamine            | No [2, 16, 19]                                    | No*               | Yes          |
| Doxazosin           | No [2, 16, 19]                                    | Low [25]          | Yes          |
| Doxepin             | High [2, 10, 12, 13, 16, 19, 29]                  | Moderate [25]     | Yes          |
| Doxycycline         | No [2, 16]                                        | No [22]           | Yes          |

| Drug Name                    | Anticholinergic Activity                 | Sedative Activity | FDA Approved |
|------------------------------|------------------------------------------|-------------------|--------------|
| Doxylamine                   | High [3, 10, 16, 18, 19, 32, 33, 35, 36] | Moderate [22]     | Yes          |
| Dulaglutide                  | No [16]                                  | No*               | Yes          |
| Duloxetine                   | No [2, 16, 19]                           | Moderate [22]     | Yes          |
| Dydrogesterone               | No [16, 19]                              | Low [22]          | DXD          |
| Edoxaban                     | No [16]                                  | No*               | Yes          |
| Empagliflozin                | No [16]                                  | No*               | Yes          |
| Enalapril                    | No [2, 16, 19]                           | Low [22]          | Yes          |
| Enasidenib                   | No*                                      | Low [22]          | Yes          |
| Encorafenib                  | No*                                      | Low [22]          | Yes          |
| Enoxaparin                   | No [2, 16, 19]                           | No*               | Yes          |
| Entacapone                   | Low [8, 16, 19, 20]                      | Low [22]          | Yes          |
| Eperisone                    | No [19]                                  | Moderate [22]     | No           |
| Epinephrine                  | No [19]                                  | No*               | Yes          |
| Eplerenone                   | No*                                      | Low[22]           | Yes          |
| Epoetin Alfa                 | No [2, 16, 19]                           | No*               | Yes          |
| Eprosartan                   | No [16, 19]                              | Low [22]          | DXD          |
| Ergocalciferol               | No [2, 16, 19]                           | No*               | Yes          |
| Ergoloid                     | No [2]                                   | No*               | Yes          |
| Ergoloid Mesylates           | No [19]                                  | No*               | Yes          |
| Ergotamine                   | No*                                      | No*               | Yes          |
| Erlotinib                    | No*                                      | Low [22]          | Yes          |
| Erythromycin                 | No [2, 16, 19]                           | No*               | Yes          |
| Escitalopram                 | Low [13, 16]                             | Moderate [22]     | Yes          |
| Eslicarbazepine              | Low*                                     | Moderate [22]     | Yes          |
| Esomeprazole                 | No [2, 16, 19]                           | Low [22]          | Yes          |
| Estazolam                    | Low [2, 19]                              | High [22]         | Yes          |
| Esterified Estrogens         | No [2, 19]                               | Low [22]          | Yes          |
| Estradiol                    | No [2, 16, 19]                           | Low [22]          | Yes          |
| Estramustine                 | No*                                      | Low [22]          | Yes          |
| Estrogen (estradiol)         | No [2, 16, 19]                           | Low [22]          | Yes          |
| Estropipate; Estrone Sulfate | No [2, 19]                               | Low [22]          | Yes          |
| Eszopiclone                  | No*                                      | High [25]         | Yes          |
| Ethambutol                   | No [2, 16, 19]                           | No*               | Yes          |
| Ethosuximide                 | No*                                      | Moderate [22]     | Yes          |
| Ethotoin                     | No*                                      | Moderate [22]     | Yes          |
| Etidronate                   | No [2, 16, 19]                           | No*               | Yes          |
| Etodolac                     | No [2, 19]                               | Low [22]          | Yes          |
| Everolimus                   | No*                                      | Low [22]          | Yes          |
| Ezetimibe                    | No [16, 19]                              | No*               | Yes          |

Running head: Quantifying Anticholinergic Burden and Sedative Load

| Drug Name             | Anticholinergic Activity               | Sedative Activity | FDA Approved |
|-----------------------|----------------------------------------|-------------------|--------------|
| Famciclovir           | No [16, 19]                            | No*               | Yes          |
| Famotidine            | Low [2, 16, 18, 31]                    | Low [22]          | Yes          |
| Felbamate             | No [2, 16]                             | Moderate [22]     | Yes          |
| Felodipine            | No [2, 16, 19]                         | Low [22]          | Yes          |
| Fenofibrate           | No [2, 16, 19]                         | Low[22]           | Yes          |
| Fenoprofen            | No*                                    | Low [22]          | Yes          |
| Fenoterol Inhalation  | No [16]                                | No*               | No           |
| Fentanyl              | Low [10, 14, 16, 18-20, 31, 40]        | Moderate[22]      | Yes          |
| Ferrous Gluconate     | No [2, 16]                             | No*               | Yes          |
| Ferrous Sulfate       | No [16]                                | No*               | Yes          |
| Fesoterodine          | High [10]                              | Low [22]          | Yes          |
| Fexofenadine          | Moderate [19]                          | Low [22]          | Yes          |
| Filgrastim            | No [2, 16, 19]                         | No*               | Yes          |
| Finasteride           | No [2, 16, 19]                         | No [22]           | Yes          |
| Fish Oil              | No [16, 19]                            | No*               | Yes          |
| Flavoxate             | High [2, 10, 16, 19]                   | Low [22]          | Yes          |
| Flecainide            | No [2, 16, 19]                         | No*               | Yes          |
| Fluconazole           | No [2, 16, 19]                         | No*               | Yes          |
| Fludarabine           | No*                                    | Low [22]          | Yes          |
| Fludrocortisone       | No [2, 16, 19]                         | No [22]           | Yes          |
| Flunisolide           | No [2, 16]                             | No [22]           | Yes          |
| Fluoxetine            | Low [2, 12-14, 16, 18, 19, 29, 31, 40] | Moderate [22]     | Yes          |
| Fluphenazine          | Moderate*                              | High [22]         | Yes          |
| Flurazepam            | Low [2, 16, 19]                        | High [22]         | Yes          |
| Flurbiprofen          | No*                                    | Low [22]          | Yes          |
| Flutamide             | No [2, 16, 19]                         | No*               | Yes          |
| Fluticasone           | No [2, 16]                             | No [22]           | Yes          |
| Fluvastatin           | No [2, 16, 19]                         | Low [22]          | Yes          |
| Fluvoxamine           | Low [2, 12, 13, 16, 18-20, 31]         | Moderate [22]     | Yes          |
| Folic Acid            | No [2, 16, 19]                         | No*               | Yes          |
| Formoterol Inhalation | No [16]                                | No*               | Yes          |
| Fosinopril            | No [2, 16, 19]                         | Low [22]          | Yes          |
| Frovatriptan          | No*                                    | Moderate [22]     | Yes          |
| Furosemide            | Low [10, 16, 18-20]                    | Low [22]          | Yes          |
| Gabapentin            | No [2, 16, 19]                         | Moderate [22]     | Yes          |
| Galantamine           | No [2, 16, 19]                         | Low [22]          | Yes          |
| Gefitinib             | No*                                    | Low [22]          | Yes          |
| Gemfibrozil           | No [2, 16, 19]                         | Low [22]          | Yes          |
| Gemifloxacin          | No*                                    | Low [22]          | Yes          |

| Drug Name                       | Anticholinergic Activity                                 | Sedative Activity | FDA Approved |
|---------------------------------|----------------------------------------------------------|-------------------|--------------|
| Ginseng                         | No [16, 19]                                              | No*               | No           |
| Glimepiride                     | No [2, 16, 19]                                           | Low [22]          | Yes          |
| Glipizide                       | No [2, 16, 19]                                           | Low [22]          | Yes          |
| Glucagon                        | No [2, 16, 19]                                           | No*               | Yes          |
| Glucosamine                     | No [2, 16, 19]                                           | No*               | No           |
| Glucose (Dextrose 5%)           | No [16, 19]                                              | No*               | Yes          |
| Glyburide/ Glibenclamide        | No [2]                                                   | Low [22]          | Yes          |
| Glycerin, Topical               | No [2]                                                   | No*               | Yes          |
| Goserelin Acetate               | No [16, 19]                                              | No*               | Yes          |
| Guaifenesin                     | Low [16, 19, 29]                                         | No*               | Yes          |
| Guanfacine                      | No [16, 19]                                              | Moderate*         | Yes          |
| Halcinonide, Topical            | No [2]                                                   | No*               | Yes          |
| Haloperidol                     | No [2]                                                   | Moderate [25]     | Yes          |
| Heparin                         | No [2, 16, 19]                                           | No*               | Yes          |
| Hydralazine                     | Low [2, 10, 16, 18-20]                                   | No*               | Yes          |
| Hydrochlorothiazide             | No [2, 16, 19]                                           | Low [22]          | Yes          |
| Hydrocodone                     | No [2]                                                   | Moderate [22]     | Yes          |
| Hydrocortisone                  | Low [2, 10, 16, 18-20, 31]                               | No [22]           | Yes          |
| Hydromorphone                   | No [2, 16, 19]                                           | Moderate [22]     | Yes          |
| Hydroxychloroquine              | No [2, 16, 19]                                           | Low [22]          | Yes          |
| Hydroxypropyl, Ophthalmic       | No [2]                                                   | No*               | Yes          |
| Hydroxyurea                     | No [2, 16, 19]                                           | Low [22]          | Yes          |
| Hydroxyzine                     | High [2, 3, 7, 8, 10, 13, 18, 19, 29, 31]                | Moderate [25]     | Yes          |
| Hyperici Herba (St John's Wort) | No*                                                      | Moderate [22]     | No           |
| Ibrutinib                       | No*                                                      | Low [22]          | Yes          |
| Ibuprofen                       | No [2, 16, 19]                                           | Low [22]          | Yes          |
| Icodextrin                      | No [2]                                                   | No*               | Yes          |
| Idelalisib                      | No*                                                      | Low [22]          | Yes          |
| Iloperidone                     | Low [10]                                                 | Moderate [22]     | Yes          |
| Imatinib                        | No*                                                      | Low [22]          | Yes          |
| Imipramine                      | High [2, 3, 7, 8, 10, 13, 16, 18, 19, 29, 31-33, 35, 36] | Moderate [25]     | Yes          |
| Indapamide                      | No [2, 16, 19]                                           | Low [22]          | Yes          |
| Indomethacin                    | No [2, 16]                                               | Moderate [25]     | Yes          |
| Influenza Virus Vaccine         | No [16, 19]                                              | No*               | Yes          |
| Inositol                        | No [16]                                                  | No*               | No           |
| Irbesartan                      | No [2, 16, 19]                                           | Low [22]          | Yes          |
| Iron                            | No [2, 19]                                               | No*               | Yes          |

| Drug Name                    | Anticholinergic Activity     | Sedative Activity | FDA Approved |
|------------------------------|------------------------------|-------------------|--------------|
| Isoniazid                    | No [2, 16, 19]               | No*               | Yes          |
| Isosorbide                   | Low [10]                     | No*               | Yes          |
| Isradipine                   | No [2, 16, 19]               | Low [22]          | Yes          |
| Ixazomib                     | No*                          | Low [22]          | Yes          |
| Ketoprofen                   | No [2, 16, 19]               | Low [22]          | Yes          |
| Ketorolac                    | Low [16, 29]                 | Low [22]          | Yes          |
| Labetalol                    | No [19]                      | Low [22]          | Yes          |
| Lacosamide                   | No                           | Moderate [22]     | Yes          |
| Lactase; Tilactase           | No [16, 19]                  | No*               | Yes          |
| Lactic Acid Bacteria         | No [19]                      | No*               | Yes          |
| Lactobacillus Rhamnosus      | No [41]                      | No*               | Yes          |
| Lactulose                    | No [2, 16, 19]               | No*               | Yes          |
| Lamotrigine                  | No [2, 16, 19]               | Moderate [22]     | Yes          |
| Lanolin-Mineral Oil, Topical | No [2]                       | No*               | Yes          |
| Lansoprazole                 | Low [2, 19]                  | Low [22]          | Yes          |
| Lapatinib                    | No*                          | Low [22]          | Yes          |
| Lenvatinib                   | No*                          | Low [22]          | Yes          |
| Leuprolide                   | No [2, 16, 19]               | No*               | Yes          |
| levetiracetam                | No [2, 16, 19]               | Moderate [22]     | Yes          |
| Levocabastine                | No [16]                      | No*               | Yes          |
| Levocetirizine               | Low [10]                     | Low [22]          | Yes          |
| Levodopa                     | No [2]                       | Low [22]          | Yes          |
| Levofloxacin                 | No [2, 16, 19]               | Low [22]          | Yes          |
| Levothyroxine                | No [2, 16, 19]               | No[22]            | Yes          |
| Lidocaine                    | No [2, 16, 19]               | No*               | Yes          |
| Liothyronine                 | No [2, 16, 19]               | No[22]            | Yes          |
| Lisinopril                   | No [2, 16, 19]               | Low [22]          | Yes          |
| Lithium                      | Low [12-14, 16, 18, 31]      | High [22]         | Yes          |
| Lomustine                    | No*                          | Low [22]          | Yes          |
| Loperamide                   | Low [10]                     | Moderate [22]     | Yes          |
| Loratadine                   | Low [10]                     | Low [22]          | Yes          |
| Lorazepam                    | Low [2, 16, 18, 19, 31]      | High [22]         | Yes          |
| Lorlatinib                   | No*                          | Low [22]          | Yes          |
| Losartan                     | No [2, 16]                   | Low [22]          | Yes          |
| Lovastatin                   | No [2, 16]                   | Low [22]          | Yes          |
| Loxapine                     | Moderate [2, 10, 16, 19, 34] | High [22]         | Yes          |
| Lurasidone                   | No [42]                      | High [22]         | Yes          |
| Lysine                       | No [2, 16]                   | No*               | Yes          |
| Magnesium                    | No [2, 16, 19]               | Low*              | Yes          |



Running head: Quantifying Anticholinergic Burden and Sedative Load

| Drug Name               | Anticholinergic Activity      | Sedative Activity | FDA Approved |
|-------------------------|-------------------------------|-------------------|--------------|
| Mannitol                | No [2, 16, 19]                | No*               | Yes          |
| Maprotiline             | High [10]                     | High [22]         | Yes          |
| Mebeverine              | No [16]                       | No*               | Yes          |
| Meclizine               | High [3, 8, 18, 19, 29, 31]   | Moderate [22]     | Yes          |
| Medroxyprogesterone     | No [2, 16, 19]                | Low [22]          | Yes          |
| Mefenamic Acid          | No*                           | Low [22]          | Yes          |
| Mefloquine              | Low [43]                      | Low [22]          | Yes          |
| Megestrol               | No [2, 16, 19]                | Low [22]          | Yes          |
| Melatonin               | No [16, 19]                   | High [22]         | Yes          |
| Meloxicam               | No [16, 19]                   | Low [22]          | Yes          |
| Memantine               | No [16, 19]                   | Low [22]          | Yes          |
| Meperidine (Pethidine)  | Moderate [2, 10]              | Moderate [22]     | Yes          |
| Meprobamate             | No [2]                        | Moderate [22]     | Yes          |
| Mercaptopurine          | No*                           | Low [22]          | Yes          |
| Mesalamine (Mesalazine) | No [2, 19]                    | No*               | Yes          |
| Metamucil (Psyllium)    | No [16]                       | No*               | Yes          |
| Metaxalone              | No [2]                        | Moderate [22]     | Yes          |
| Metformin               | No [13, 16]                   | No*               | Yes          |
| Methadone               | Moderate [16, 18, 29, 31, 34] | Moderate [25]     | Yes          |
| Methazolamide           | No [2, 19]                    | Low [22]          | Yes          |
| Methenamine             | No [2, 16]                    | No*               | Yes          |
| Methocarbamol           | Low [8, 16, 19, 29]           | Moderate [22]     | Yes          |
| Methotrexate            | No [2, 19]                    | Low [22]          | Yes          |
| Methyclothiazide        | No [2]                        | Low [22]          | Yes          |
| Methylcellulose         | No [2, 19]                    | No*               | Yes          |
| Methyldopa              | No [2, 16, 19]                | Low [22]          | Yes          |
| Methylene Blue          | No [2, 16, 19]                | No*               | Yes          |
| Methylphenidate         | No [2, 16, 19]                | No*               | Yes          |
| Methylprednisolone      | Low [2, 16, 18, 31]           | No [22]           | Yes          |
| Methyltestosterone      | No [2, 19]                    | Low [22]          | Yes          |
| Metoclopramide          | No [19]                       | Moderate [22]     | Yes          |
| Metolazone              | No [2, 19]                    | Low [22]          | Yes          |
| Metoprolol              | Low [10, 16, 18, 20, 29, 31]  | Low [22]          | Yes          |
| Metronidazole           | No [2, 16, 19]                | Low [22]          | Yes          |
| Mexiletine              | No [2, 19]                    | No*               | Yes          |
| Midazolam               | Low [2, 16, 18, 20, 31]       | High [22]         | Yes          |
| Midodrine               | No [2, 16, 19]                | No*               | Yes          |
| Midostaurin             | No*                           | Low [22]          | Yes          |

| Drug Name           | Anticholinergic Activity                  | Sedative Activity | FDA Approved |
|---------------------|-------------------------------------------|-------------------|--------------|
| Milnacipran         | No*                                       | Moderate [22]     | Yes          |
| Miltefosine         | No*                                       | Low [22]          | Yes          |
| Mineral Oil         | No [2]                                    | No*               | Yes          |
| Minocycline         | No [2, 16, 19]                            | No [22]           | Yes          |
| Mirabegron          | No                                        | Low [22]          | No           |
| Mirtazapine         | Low [8, 12, 14, 16, 18-20, 31, 40]        | Moderate [22]     | Yes          |
| Misoprostol         | No [2]                                    | Low*              | Yes          |
| Mitotane            | No*                                       | Low [22]          | Yes          |
| Modafinil           | No [16, 19]                               | No*               | Yes          |
| Moexipril           | No [2, 16, 19]                            | Low [22]          | Yes          |
| Molindone           | Moderate [2, 10, 19]                      | High [25]         | Yes          |
| Mometasone Furoate  | No [16]                                   | No [22]           | Yes          |
| Montelukast         | No [2, 16, 19]                            | Low [22]          | Yes          |
| Morphine            | Low [2, 7, 10, 12, 16, 18-20, 29, 31, 40] | Moderate [22]     | Yes          |
| Moxifloxacin        | No [2, 16, 19]                            | Low[22]           | Yes          |
| Multivitamin        | No [2, 16, 19]                            | No*               | Yes          |
| Mupirocin, Topical  | No [2]                                    | No*               | Yes          |
| Nabumetone          | No [2, 16, 19]                            | Low [22]          | Yes          |
| N-Acetyl-L-Cysteine | No [16, 19]                               | No*               | Yes          |
| Nadolol             | No [2]                                    | Low [22]          | Yes          |
| Naltrexone          | Low*                                      | Low [22]          | Yes          |
| Naproxen            | No [2, 16, 19]                            | Low [22]          | Yes          |
| Naratriptan         | Low [13, 16, 19]                          | Moderate [22]     | Yes          |
| Nateglinide         | No [2, 16, 19]                            | No*               | Yes          |
| Nefazodone          | Low [29]                                  | Moderate [22]     | Yes          |
| Neratinib           | No*                                       | Low [22]          | Yes          |
| Niacin              | No [2, 16, 19]                            | No*               | Yes          |
| Nicardipine         | No*                                       | Low [22]          | Yes          |
| Nifedipine          | Low [2, 10, 16, 18, 20, 31]               | Low [22]          | Yes          |
| Nilotinib           | No*                                       | Low [22]          | Yes          |
| Nimodipine          | No*                                       | Low [22]          | Yes          |
| Nintedanib          | No*                                       | Low [22]          | Yes          |
| Niraparib           | No*                                       | Low [22]          | Yes          |
| Nisoldipine         | No [2, 16, 19]                            | Low [22]          | Yes          |
| Nitazoxanide        | No*                                       | Low [22]          | Yes          |
| Nitrofurantoin      | No [2, 16, 19]                            | No*               | Yes          |
| Nitroglycerin       | No [2, 19]                                | No*               | Yes          |
| Nizatidine          | Low [2]                                   | Low [22]          | Yes          |

| Drug Name                  | Anticholinergic Activity               | Sedative Activity | FDA Approved |
|----------------------------|----------------------------------------|-------------------|--------------|
| Norepinephrine             | No [2, 16, 19]                         | No*               | Yes          |
| Norethisterone             | No [16, 19]                            | Low [22]          | Yes          |
| Norfloracin                | No [16, 19]                            | Low [22]          | Yes          |
| Nortriptyline              | High [2, 10, 29]                       | High [22]         | Yes          |
| Nystatin                   | No [2, 16, 19]                         | No*               | Yes          |
| Octreotide                 | No [2, 16, 19]                         | No*               | Yes          |
| Ofloxacin                  | No [2, 16, 19]                         | Low [22]          | Yes          |
| Olanzapine                 | Moderate [8, 29]                       | Moderate [22]     | Yes          |
| Olaparib                   | No*                                    | Low [22]          | Yes          |
| Olmesartan                 | No [16, 19]                            | Low [22]          | Yes          |
| Omega-3                    | No [16, 19]                            | No*               | Yes          |
| Omeprazole                 | No [2, 16, 19]                         | Low [22]          | Yes          |
| Orphenadrine (citrate)     | High [2, 3, 7, 10, 12, 16, 18, 19, 34] | Moderate [22]     | Yes          |
| Osimertinib                | No*                                    | Low [22]          | Yes          |
| Oxaprozin                  | No*                                    | Low [22]          | Yes          |
| Oxatomide                  | No [19]                                | Moderate [22]     | No           |
| Oxazepam                   | Low [2, 13, 16]                        | High [22]         | Yes          |
| Oxcarbazepine              | Moderate [2, 10, 16, 19, 31, 34]       | Moderate [22]     | Yes          |
| Oxybutynin                 | High*                                  | Low [22]          | Yes          |
| Oxycodone                  | Low [2, 13, 16, 18, 19, 29, 31, 40]    | Moderate [22]     | Yes          |
| Palbociclib                | No*                                    | Low [22]          | Yes          |
| Paliperidone               | Low [10, 16, 19, 20]                   | Moderate [22]     | Yes          |
| Pamidronate                | No [19]                                | No*               | Yes          |
| Pancrelipase               | No [13]                                | No*               | Yes          |
| Panobinostat               | No*                                    | Low [22]          | Yes          |
| Pantoprazole               | No [2, 16, 19]                         | Low [22]          | Yes          |
| Paracetamol; Acetaminophen | No [16]                                | No [22]           | Yes          |
| Paroxetine                 | Moderate [13, 29]                      | Moderate [22]     | Yes          |
| Pazopanib                  | No*                                    | Low [22]          | Yes          |
| Penicillin                 | No [2, 19]                             | No [22]           | Yes          |
| Pentazocine                | No [16, 19]                            | Moderate [22]     | Yes          |
| Pentoxifylline             | No [2, 16, 19]                         | No [22]           | Yes          |
| Perampanel                 | No*                                    | Moderate [22]     | Yes          |
| Pergolide                  | No [2, 16]                             | Moderate [25]     | Yes          |
| Perindopril                | No [2, 16, 19]                         | Low [22]          | Yes          |
| Perphenazine               | Moderate [29]                          | High[22]          | Yes          |
| Phenazopyridine            | No [2]                                 | No*               | Yes          |
| Phenelzine                 | Low [2]                                | High [22]         | Yes          |



Running head: Quantifying Anticholinergic Burden and Sedative Load

| Drug Name                                   | Anticholinergic Activity             | Sedative Activity | FDA Approved |
|---------------------------------------------|--------------------------------------|-------------------|--------------|
| Phenobarbital                               | Low [12, 16, 18, 29]                 | Moderate [22]     | Yes          |
| Phenprocoumon                               | No [16]                              | No*               | Yes          |
| Phenylephrine                               | No [2, 16, 19]                       | No*               | Yes          |
| Phenytoin                                   | No [2, 16, 19]                       | Moderate [22]     | Yes          |
| Phytonadione                                | No [2]                               | No*               | Yes          |
| Pilocarpine                                 | No [16, 19]                          | No*               | Yes          |
| Pimavanserin                                | No*                                  | Moderate [22]     | Yes          |
| Pimozide                                    | Moderate [2, 10, 16, 18, 19, 31, 34] | Moderate [22]     | Yes          |
| Pindolol                                    | No [2, 16]                           | Low [22]          | Yes          |
| Pioglitazone                                | No [2, 16, 19]                       | No*               | Yes          |
| Piroxicam                                   | No [2, 16, 19]                       | Low [22]          | Yes          |
| Pitavastatin                                | No*                                  | Low [22]          | Yes          |
| Pivampicillin                               | No [2]                               | No*               | No           |
| Polyethelene Glycol                         | No [2, 16]                           | No*               | Yes          |
| Polymyxin B, Ophthalmic                     | No [2]                               | No*               | Yes          |
| Polyvinyl Alcohol                           | No [16]                              | No*               | Yes          |
| Ponatinib                                   | No*                                  | Low [22]          | Yes          |
| Potassium Bicarbonate                       | No [16]                              | No*               | Yes          |
| Potassium Chloride                          | No [16]                              | No*               | Yes          |
| Potassium Citrate                           | No [16]                              | No*               | Yes          |
| Pramipexole                                 | Low [8, 16, 18, 31]                  | Low [22]          | Yes          |
| Pravastatin                                 | No [2, 16, 19]                       | Low [22]          | Yes          |
| Prazosin                                    | No [2, 19]                           | Low [25]          | Yes          |
| Prednisolone                                | Low [2, 14, 16, 18, 20, 31]          | No*               | Yes          |
| Prednisone                                  | Low [2, 10, 16, 18, 20, 31]          | No [22]           | Yes          |
| Pregabalin                                  | Moderate*                            | Moderate [22]     | Yes          |
| Primaquine                                  | Low*                                 | Low [22]          | Yes          |
| Primidone                                   | No [2, 16, 19]                       | Moderate [22]     | Yes          |
| Probenecid                                  | No [2, 16]                           | No*               | Yes          |
| Procainamide                                | No [2]                               | No*               | Yes          |
| Prochlorperazine                            | Moderate [8, 13, 29]                 | High [22]         | Yes          |
| Procyclidine                                | High [16, 19]                        | Moderate [22]     | Yes          |
| Progesterone                                | No [2, 16, 19]                       | Low [22]          | Yes          |
| Proguanil                                   | No*                                  | Low [22]          | Yes          |
| Promethazine                                | High [2, 8, 10, 16, 18, 31, 34]      | Moderate [25]     | Yes          |
| Propafenone                                 | No [2, 16, 19]                       | No*               | Yes          |
| Propoxyphene chloride (Dextro-propoxyphene) | Moderate [29]                        | Moderate [22]     | Yes          |

| Drug Name               | Anticholinergic Activity               | Sedative Activity | FDA Approved |
|-------------------------|----------------------------------------|-------------------|--------------|
| Propranolol             | No [2, 16, 19]                         | Low [22]          | Yes          |
| Propylene Glycol        | No [16]                                | No*               | Yes          |
| Propylthiouracil        | No [2, 16, 19]                         | No*               | Yes          |
| Protamine               | No [16, 19]                            | No*               | Yes          |
| Protriptyline           | High [2, 13]                           | High [22]         | Yes          |
| Pseudoephedrine         | Moderate [3, 8, 13, 31]                | No*               | Yes          |
| Psyllium                | No [2, 16, 19]                         | No*               | Yes          |
| Pyrazinamide            | No [2, 16, 19]                         | No*               | Yes          |
| Pyridostigmine          | No [2, 16, 19]                         | No*               | Yes          |
| Pyridoxine              | No [16, 19]                            | No*               | Yes          |
| Pyrilamine (Mepiramine) | High [2, 19]                           | Moderate [22]     | DXD          |
| Pyrimethamine           | No*                                    | Low [22]          | Yes          |
| Quazepam                | No*                                    | High [22]         | Yes          |
| Quetiapine              | Moderate [29]                          | Moderate [22]     | Yes          |
| Quinapril               | No [2, 16, 19]                         | Low [22]          | Yes          |
| Quinidine               | Low [10, 16, 20]                       | No*               | Yes          |
| Quinine                 | No [2, 19]                             | Low [22]          | Yes          |
| Rabeprazole             | No [2, 16, 19]                         | Low [22]          | Yes          |
| Raloxifene              | No [2, 16, 19]                         | No*               | Yes          |
| Ramelteon               | No*                                    | High [25]         | Yes          |
| Ramipril                | No [2, 16, 19]                         | Low [22]          | Yes          |
| Ranitidine              | Low [2, 8, 12, 13]                     | Low [22]          | DXD          |
| Rasagiline              | No*                                    | Low [22]          | Yes          |
| Regorafenib             | No*                                    | Low [22]          | Yes          |
| Repaglinide             | No [2, 16, 19]                         | No*               | Yes          |
| Ribociclib              | No*                                    | Low [22]          | Yes          |
| Rifampin                | No [2, 16]                             | Low [22]          | Yes          |
| Rimantadine             | No [2]                                 | No*               | Yes          |
| Risedronate             | No [2, 16, 19]                         | No*               | Yes          |
| Risperidone             | Low [8, 10, 13, 16, 18-20, 29, 31, 40] | Moderate [22]     | Yes          |
| Rivastigmine            | No [16, 19]                            | Low [22]          | Yes          |
| Rofecoxib               | No [2]                                 | Low [22]          | DXD          |
| Ropinirole              | No [2, 16, 19]                         | Low [22]          | Yes          |
| Rosiglitazone           | No [2, 19]                             | No*               | Yes          |
| Rosuvastatin            | No [16, 19]                            | Low [22]          | Yes          |
| Rucaparib               | No*                                    | Low [22]          | Yes          |
| Rufinamide              | No*                                    | Moderate [22]     | Yes          |
| Ruxolitinib             | No*                                    | Low [22]          | Yes          |
| Saccharomyces Boulardii | No                                     | No*               | Yes          |

| Drug Name                               | Anticholinergic Activity            | Sedative Activity | FDA Approved |
|-----------------------------------------|-------------------------------------|-------------------|--------------|
| Safinamide                              | No*                                 | Low [22]          | Yes          |
| Salbutamol; Albuterol                   | No [16, 19]                         | No*               | Yes          |
| Salicylic, Topical                      | No [2]                              | No*               | Yes          |
| Salmeterol                              | No [2, 16]                          | No*               | Yes          |
| Salsalate                               | No [2, 19]                          | No*               | No           |
| Scopolamine (Hyoscine/ Hyoscamine)      | High [2, 8, 10, 16, 19, 20, 32, 33] | Moderate [22]     | Yes          |
| Secobarbital                            | Moderate*                           | High [22]         | Yes          |
| Selegiline                              | Low [8, 16, 18, 29, 31]             | Low [22]          | Yes          |
| Senna (Leaf); Sennosides A & B; Senokot | No [16]                             | No*               | Yes          |
| Sertraline                              | Low [2, 8, 16, 18, 29, 31]          | Moderate [22]     | Yes          |
| Sevelamer                               | No [16]                             | No*               | Yes          |
| Sildenafil                              | No [16, 19]                         | No*               | Yes          |
| Simethicone                             | No [2, 16, 19]                      | No*               | Yes          |
| Simvastatin                             | No [2, 16, 19]                      | Low [22]          | Yes          |
| Sitagliptin                             | No [16]                             | No*               | Yes          |
| Sodium Bicarbonate                      | No [16, 19]                         | No*               | Yes          |
| Sodium Chloride                         | No [16, 19]                         | No*               | Yes          |
| Sodium Phosphate                        | No [16]                             | No*               | Yes          |
| Solifenacin                             | High [10, 16, 18, 19, 31-33]        | Low [22]          | Yes          |
| Sonidegib                               | No*                                 | Low [22]          | Yes          |
| Sorafenib                               | No*                                 | Low [22]          | Yes          |
| Sotalol                                 | No [2, 16, 19]                      | Low [22]          | Yes          |
| Spirolactone                            | No [2, 16, 19]                      | Low [22]          | Yes          |
| Stiripentol                             | No*                                 | Moderate [22]     | Yes          |
| Succinylcholine                         | No [2, 16, 19]                      | No*               | Yes          |
| Sucralfate                              | No [2, 16, 19]                      | No*               | Yes          |
| Sulfamethizole                          | No [2]                              | No*               | DXD          |
| Sulfamethoxazole                        | No [2, 16, 19]                      | No*               | Yes          |
| Sulfasalazine                           | No [16, 19]                         | No*               | Yes          |
| Sulindac                                | No [2, 19]                          | Low [22]          | Yes          |
| Sumatriptan                             | Low [13, 16]                        | Moderate [22]     | Yes          |
| Sunitinib                               | No*                                 | Low [22]          | Yes          |
| Suvorexant                              | No*                                 | High [22]         | Yes          |
| Tadalafil                               | No [16, 19]                         | No*               | Yes          |
| Talazoparib                             | No*                                 | Low [22]          | Yes          |
| Tamoxifen                               | No [2, 16, 19]                      | Low [22]          | Yes          |
| Tamsulosin                              | No [2, 16, 19]                      | No*               | Yes          |
| Tapentadol                              | No*                                 | Moderate [22]     | Yes          |

Running head: Quantifying Anticholinergic Burden and Sedative Load

| Drug Name                | Anticholinergic Activity            | Sedative Activity | FDA Approved |
|--------------------------|-------------------------------------|-------------------|--------------|
| Tasimelteon              | No*                                 | High [25]         | Yes          |
| Telmisartan              | No [16, 19]                         | Low [22]          | Yes          |
| Temazepam                | Low [2, 8, 13, 16, 19]              | High [25]         | Yes          |
| Temozolomide             | No*                                 | Low [22]          | Yes          |
| Terazosin                | No [2, 16, 19]                      | Low [25]          | Yes          |
| Terbinafine              | No [16, 19]                         | No*               | Yes          |
| Terbutaline              | No [2, 16]                          | No*               | Yes          |
| Teriparatide             | No [16]                             | No*               | Yes          |
| Tetracycline             | No [2, 16, 19]                      | No [22]           | Yes          |
| Theophylline             | No*                                 | Moderate [22]     | Yes          |
| Thiamazole (Methimazole) | No [16]                             | No*               | Yes          |
| Thiamine                 | No [2, 16, 19]                      | No*               | Yes          |
| Thioridazine             | High [3, 8, 10, 12, 16, 18, 19, 34] | High [22]         | Yes          |
| Thiothixene              | Low [2]                             | No*               | Yes          |
| Thyroid Desiccated       | No [2]                              | No [22]           | Yes          |
| Tiagabine                | No*                                 | Moderate [22]     | Yes          |
| Tianeptine               | No [19]                             | Moderate [22]     | No           |
| Tiaprofenic Acid         | No [16, 19]                         | Moderate [22]     | No           |
| Ticlopidine              | No [2, 16, 19]                      | No*               | Yes          |
| Timolol                  | No [8, 16, 19]                      | Low [22]          | Yes          |
| Tinidazole               | No*                                 | Low [22]          | Yes          |
| Tizanidine               | High [3, 8, 16, 31, 34]             | Moderate [22]     | Yes          |
| Tocopherol, Vitamin E    | No [19]                             | No*               | Yes          |
| Tolazamide               | No*                                 | Low [22]          | Yes          |
| Tolbutamide              | No [2, 16]                          | Low [22]          | Yes          |
| Tolcapone                | No [2, 16]                          | Low [22]          | Yes          |

| Drug Name                            | Anticholinergic Activity                  | Sedative Activity | FDA Approved |
|--------------------------------------|-------------------------------------------|-------------------|--------------|
| Tolmetin                             | No*                                       | Low [22]          | Yes          |
| Tolterodine                          | High [10, 11, 13, 16, 18-20, 29, 31]      | Low [22]          | Yes          |
| Topiramate                           | No [2, 16, 19]                            | Moderate [22]     | Yes          |
| Torseamide                           | No [2, 16, 19]                            | No*               | Yes          |
| Tramadol                             | Moderate [13, 16, 29]                     | Moderate [22]     | Yes          |
| Trametinib                           | No*                                       | Low [22]          | Yes          |
| Trandolapril                         | Low [16, 29, 34]                          | Low [22]          | Yes          |
| Travoprost                           | No [16]                                   | No*               | Yes          |
| Trazodone                            | Low [8, 10, 16, 18, 19, 29, 31, 40]       | Moderate [22]     | Yes          |
| Triamterene                          | Low [2, 10, 16, 18, 20, 31]               | Low [22]          | Yes          |
| Triazolam                            | Low [2, 16, 19, 20, 29]                   | High [22]         | Yes          |
| Trichlormethiazide                   | No [2]                                    | No*               | Yes          |
| Trifluoperazine                      | High [8, 10]                              | High [22]         | Yes          |
| Trihexyphenidyl                      | High [2, 7, 10, 12, 16, 18-20, 29, 31-34] | Low [22]          | Yes          |
| Trimethoprim                         | No [2, 16]                                | No*               | Yes          |
| Trimipramine                         | High [2, 7, 12, 16, 34]                   | High [22]         | Yes          |
| Tripolidine                          | High [18, 33]                             | Low [22]          | Yes          |
| Trospium                             | High [10, 16, 19]                         | Low [22]          | Yes          |
| Tuberculin Purified Protein Derivate | No [2, 16, 19]                            | No*               | Yes          |
| Ubidecarenone                        | No [16, 19]                               | No*               | Yes          |
| Urea                                 | No [2]                                    | No*               | Yes          |
| Ursodiol                             | No [2, 16, 19]                            | No*               | Yes          |
| Valproic acid                        | Low [2, 16, 18, 31]                       | Moderate [22]     | Yes          |
| Valsartan                            | No [2, 16, 19]                            | Low [22]          | Yes          |
| Vancomycin                           | Low [2, 16, 18, 31]                       | No*               | Yes          |

| Drug Name      | Anticholinergic Activity    | Sedative Activity | FDA Approved |
|----------------|-----------------------------|-------------------|--------------|
| Vandetanib     | No*                         | Low [22]          | Yes          |
| Vardenafil     | No [16, 19]                 | Low*              | Yes          |
| Varenicline    | No [16, 19]                 | No*               | Yes          |
| Vecuronium     | No [2, 16, 19]              | No*               | Yes          |
| Vemurafenib    | No [16]                     | Low [22]          | Yes          |
| Venetoclax     | No*                         | Low [22]          | Yes          |
| Venlafaxine    | Low [10, 13, 16, 18-20, 29] | Moderate [22]     | Yes          |
| Verapamil      | No [2, 16, 19]              | Low [22]          | Yes          |
| Vigabatrin     | No*                         | Moderate[22]      | Yes          |
| Vismodegib     | No*                         | Low [22]          | Yes          |
| Vitamin E      | No [2, 16]                  | No*               | Yes          |
| Vitamin K      | No [19]                     | No*               | Yes          |
| Vorinostat     | No*                         | Low [22]          | Yes          |
| Vortioxetine   | No*                         | Moderate [22]     | Yes          |
| Warfarin       | Low [2, 16, 18-20, 31]      | No*               | Yes          |
| Zafirlukast    | No [2, 19]                  | Low [22]          | Yes          |
| Zaleplon       | No [2, 16]                  | High [25]         | Yes          |
| Zinc           | No [2, 16, 19]              | No*               | Yes          |
| Ziprasidone    | Low [8, 16, 19]             | High [22]         | Yes          |
| Zolmitriptan   | No [19]                     | Moderate [22]     | Yes          |
| Zolpidem       | No [2, 16, 19]              | High [25]         | Yes          |
| Zonisamide     | Low*                        | Moderate [22]     | Yes          |
| Zuclopenthixol | Low*                        | High [22]         | No           |

\*Indicates Monograph or Drug Label

Color key: No activity, Low activity, Moderate activity, High activity

DXD = Discontinued

Supplementary Table S3 Scales detailed citation analysis

| Scale                | Google Scholar | Web of Science (Total Citations) | Average per Year | Web of Science (YTD) |      |      |      |      |      |      |      |      |      |      |      |      |      |      |                      |      |   |
|----------------------|----------------|----------------------------------|------------------|----------------------|------|------|------|------|------|------|------|------|------|------|------|------|------|------|----------------------|------|---|
|                      |                |                                  |                  | 1900-2004            | 2005 | 2006 | 2007 | 2008 | 2009 | 2010 | 2011 | 2012 | 2013 | 2014 | 2015 | 2016 | 2017 | 2018 | 2019                 | 2020 |   |
| <i>ARS</i>           | 600            | 359                              | 27.62            | 0                    | 0    | 0    | 0    | 10   | 10   | 7    | 24   | 24   | 22   | 34   | 34   | 25   | 41   | 46   | 55                   | 27   |   |
| <i>ABC</i>           | 577            | 332                              | 22.13            | 0                    | 0    | 10   | 12   | 37   | 32   | 15   | 27   | 18   | 21   | 20   | 25   | 22   | 28   | 18   | 30                   | 17   |   |
| <i>ADS</i>           | 481            | 295                              | 19.67            | 0                    | 0    | 0    | 0    | 3    | 12   | 9    | 21   | 19   | 24   | 24   | 28   | 30   | 37   | 23   | (Kiesel et al, 2018) | 27   |   |
| <i>ACB</i>           | 429            | NA                               | NA               | NA                   | NA   | NA   | NA   | NA   | NA   | NA   | NA   | NA   | NA   | NA   | NA   | NA   | NA   | NA   | NA                   | NA   |   |
| <i>AAS</i>           | 172            | 96                               | 8.73             | 0                    | 0    | 0    | 0    | 0    | 0    | 2    | 7    | 6    | 5    | 6    | 7    | 6    | 10   | 11   | 23                   | 13   |   |
| <i>ALS</i>           | 84             | 56                               | 5.6              | 0                    | 0    | 0    | 0    | 0    | 0    | 0    | 1    | 4    | 3    | 1    | 6    | 7    | 6    | 9    | 12                   | 7    |   |
| <i>AEC</i>           | 26             | 12                               | 3                | 0                    | 0    | 0    | 0    | 0    | 0    | 0    | 0    | 0    | 0    | 0    | 0    | 0    | 0    | 0    | 3                    | 4    | 5 |
| <i>German ACB</i>    | 8              | 5                                | 1.67             | 0                    | 0    | 0    | 0    | 0    | 0    | 0    | 0    | 0    | 0    | 0    | 0    | 0    | 0    | 0    | 0                    | 2    | 3 |
| <i>KABS</i>          | 6              | 3                                | 1.5              | 0                    | 0    | 0    | 0    | 0    | 0    | 0    | 0    | 0    | 0    | 0    | 0    | 0    | 0    | 0    | 0                    | 1    | 2 |
| <i>mACB</i>          | 5              | 2                                | 1                | 0                    | 0    | 0    | 0    | 0    | 0    | 0    | 0    | 0    | 0    | 0    | 0    | 0    | 0    | 0    | 0                    | 0    | 2 |
| <i>Brazilian ACB</i> | 1              | 0                                | 0                | 0                    | 0    | 0    | 0    | 0    | 0    | 0    | 0    | 0    | 0    | 0    | 0    | 0    | 0    | 0    | 0                    | 0    | 0 |
| <i>SLM</i>           | 46             | 27                               | 1.59             | 0                    | 1    | 2    | 0    | 2    | 2    | 2    | 4    | 3    | 0    | 2    | 1    | 2    | 3    | 2    | 1                    | 0    |   |
| <i>Sloane</i>        | 26             | 19                               | 1.46             | 0                    | 0    | 0    | 0    | 0    | 1    | 3    | 1    | 1    | 0    | 4    | 2    | 2    | 2    | 1    | 0                    | 2    |   |

Key: YTD: Year -To-Date, ADS: Anticholinergic Drug Scale; ABC: Anticholinergic Burden Classification; ARS: Anticholinergic Rating Scale; ACB: Anticholinergic Cognitive Burden; AAS: Anticholinergic Activity Scale; ALS: Anticholinergic Load Scale; AEC: Anticholinergic Effect on Cognition, KABS: Korean Anticholinergic Burden Scale, mACB: modified Anticholinergic Cognitive Burden scale, SLM: Sedative Load Model, NA: Not Available.

Table S4: A summary of selected validation studies that evaluated the different rating scales in older adults

| Scale/Model | Validation study design / duration                                                                                                          | Study population                                                                                                                                                                                 | Measured outcomes                                                                                                            | Results and clinical outcomes                                                                                                                                                                                                                                                                                                                                                                                                                                                                    |
|-------------|---------------------------------------------------------------------------------------------------------------------------------------------|--------------------------------------------------------------------------------------------------------------------------------------------------------------------------------------------------|------------------------------------------------------------------------------------------------------------------------------|--------------------------------------------------------------------------------------------------------------------------------------------------------------------------------------------------------------------------------------------------------------------------------------------------------------------------------------------------------------------------------------------------------------------------------------------------------------------------------------------------|
| <b>ADS</b>  | Cross-sectional, observational study / 1 month [2]                                                                                          | Long-term care facility residents in the USA (n= 201, mean age 86 ± 7 years)                                                                                                                     | Serum anticholinergic activity (SAA)                                                                                         | A significant association was reported between the ADS scores and the measured SAA                                                                                                                                                                                                                                                                                                                                                                                                               |
|             | Cross-sectional, randomized controlled trial / 2 years [44]                                                                                 | Nine rural municipalities with 70 000 inhabitants in Northern Norway (n=387, mean age 76 ± 6 years)                                                                                              | Comorbidity score and current drug use in participants with and without AD                                                   | This study included ADS level 2 and 3 drugs only. AD participants had a higher co-morbidity score not clinically significant when adjusted to dose and gender. AD participants had almost two-fold use of drugs and higher percentage of inappropriate use of anticholinergic, anxiolytic-hypnotic and antidepressants.                                                                                                                                                                          |
|             | Analyses of data collected from the AGP (Ageing in General Practice) study, a cluster randomized clinical trial / 2 years [45, 46]          | Patients who could speak English, aged ≥ 75 years and had visited the GP within the last 12 months in Australia (n=1044, mean age 81.3 ± 4.2 years)                                              | The Geriatric depression scale (GDS), the Revised Cambridge Cognitive Examination (CAMCOG-R), and quality-of-life instrument | Dementia patients had significantly higher number of medications, higher anticholinergic load and consumed higher proportion of anticholinergic drugs compared to non-demented patients. Patient factors associated with increased anticholinergic load were polypharmacy, increased age, depression, lower physical quality of life and CAMCOG-R dementia. ADS level 1 drugs contributed around 70% of total burden followed by around 25% level 3 drugs and less than 10% of level 2 drugs.    |
|             | Analysis of data from the population-based Geriatric Multidisciplinary Strategy for the Good Care of the Elderly (GeMS) Study/ 3 years [47] | Randomly selected persons aged ≥ 75 years in Finland. (n=621, mean age 81.7 ± 4.9 years)                                                                                                         | SAA, vision, cognitive function, mood, and functional capacity                                                               | Measurement of SAA was not associated with anticholinergic adverse events. In contrast, anticholinergic burden calculated using the ADS, ARS and Chew's list was inversely associated with short-distance vision, activities of daily living (ADL) and instrumental ADL. The strongest association was found when using ADS and Chew. The ADS covered more than 88% of drugs used compared to 55% and 5% covered by Chew's list and ARS respectively.                                            |
|             | Randomized clinical interventional trial / 8 weeks [48]                                                                                     | Patients actively enrolled in a cohort at the Alzheimer's Disease Center at University of Kentucky in USA, aged ≥ 65 years reporting ≥ 1 anticholinergic drug. (n=50, mean age 77.7 ± 6.6 years) | Changes in the medication appropriateness index (MAI) and ADS score from baseline to the end of study                        | Pharmacist–physician targeted medication management interventions resulted in significant improvement in MAI, improvement in clinical dementia rating and reduction in ADS scores in the intervention group compared to control.                                                                                                                                                                                                                                                                 |
| <b>ACB</b>  | Cross-sectional, retrospective study 8 months [49]                                                                                          | Older patients admitted to the acute geriatric unit of the San Gerardo Hospital in Italy (n=477, mean age 84 ± 6.5 years)                                                                        | Comorbidity Index, nutritional status, activities of daily living, dementia diagnosis, and ACB score                         | Th cumulative anticholinergic exposure measured using the ACB scale was only partially associated with delirium in a sample of hospitalized older adults. A dose-response relationship between anticholinergic burden and delirium was significant at univariate analysis only. Patients with a sum of ACB score of 0 to 2 had a plateau risk of delirium, patients who scored ≥3 had about 3 or 6 times the risk of delirium than those not taking anticholinergic drugs.                       |
|             | Prospective cohort study / 4.7 years [50]                                                                                                   | Community-dwelling older adults initially free of dementia, cardiovascular disease or any significant life-limiting diseases in Australia and the USA (n=19114, age 65+ years)                   | Cognitive assessments, dementia diagnosis, stroke diagnosis, and ACB score                                                   | Participants who were female, older in age, from the USA, had lower education, current or former smokers, or had diabetes, chronic kidney disease, depression, or hypertension, were more likely to have a higher ACB score. Dementia and incident stroke rates were higher in participants with an ACB score of ≥ 3 compared to score 0 and were more likely to be diagnosed with possible AD dementia. No association between anticholinergics and probable Alzheimer's dementia was observed. |
|             | Longitudinal cohort study / 2 years [51]                                                                                                    | Community-dwelling and institutionalized participant in five study centers in England and Wales (n=13004, age 65+ years)                                                                         | Cognitive measures, activities of daily living, medication use, and ACB score                                                | An inverse correlation was observed between total ACB score and cognitive function score. For every additional point scored on the ACB, the odds of dying increased by 26%. Overall, the use of medications with anticholinergic activity increased the risk of cognitive decline and mortality over 2 years in participants with normal or mildly impaired cognition.                                                                                                                           |

Running head: Quantifying Anticholinergic Burden and Sedative Load

|            |                                                                                                                                             |                                                                                                                                                                                                                                                               |                                                                                                                                                                                                       |                                                                                                                                                                                                                                                                                                                                                                                                                                                                                                                                                                     |
|------------|---------------------------------------------------------------------------------------------------------------------------------------------|---------------------------------------------------------------------------------------------------------------------------------------------------------------------------------------------------------------------------------------------------------------|-------------------------------------------------------------------------------------------------------------------------------------------------------------------------------------------------------|---------------------------------------------------------------------------------------------------------------------------------------------------------------------------------------------------------------------------------------------------------------------------------------------------------------------------------------------------------------------------------------------------------------------------------------------------------------------------------------------------------------------------------------------------------------------|
|            | Longitudinal observational study / 6 years [52]                                                                                             | Community-dwelling African American subjects aged $\geq 70$ years who were enrolled in the Indianapolis-Ibadan Dementia Project in the USA (n=1652, mean age $81 \pm 5.3$ years)                                                                              | Cognitive function and ACB score                                                                                                                                                                      | The use of definite anticholinergics (score of 2 or 3 on the ACB) alone may increase the risk of less severe forms of cognitive impairment.                                                                                                                                                                                                                                                                                                                                                                                                                         |
|            | Nested case-control study utilizing data from the Clinical Practice Research Datalink/ 9 years [53]                                         | Patients with a recorded diagnosis of dementia made between April 2006 and July 2015 from general practices in the UK (n=40770, patient age 65-99 years)                                                                                                      | Incident dementia and ACB score                                                                                                                                                                       | In this case-control study of older adults increasing average ACB score was associated with dementia. The risk of dementia increased with greater exposure to ACB score 3 antidepressant, urological, and anti-Parkinson drugs. This result was also reported for exposure 15-20 years before a diagnosis.                                                                                                                                                                                                                                                          |
|            | Cross-sectional analysis utilizing baseline data from the prospective research on memory clinics / 3 years [54]                             | Community-dwelling patients with mild cognitive impairment or dementia in Australia (n= 964, mean age 77.6 years)                                                                                                                                             | Medication use, potentially inappropriate medication related to cognitive impairment (PIMcog) and the ACB score                                                                                       | Clinically significant anticholinergic cognitive burden (ACB $\geq 3$ ) was present in 11.7 % of patients. PIMcog use, ACB $\geq 3$ , and concomitant use of anticholinergic medications with cholinesterase inhibitors were prevalent in this population of patients attending memory clinics.                                                                                                                                                                                                                                                                     |
|            | Longitudinal, retrospective observational study/ 5 years [55]                                                                               | Older adults residing in nursing homes in Italy (n= 3761, mean age $83 \pm 7$ years)                                                                                                                                                                          | Comprehensive clinical and functional assessment, and ACB score                                                                                                                                       | Older adult patients with and ACB score of 1 and $\geq 2$ showed a higher hazard to develop the primary outcome of composite occurrence of overall mortality/first hospitalization compared with patients with no anticholinergic medications' exposure.                                                                                                                                                                                                                                                                                                            |
| <b>ARS</b> | Retrospective cohort study (1 year) / Prospective cohort study (1 year) {Rudolph, 2008 #30}                                                 | Retrospective cohort (n=132, age $\geq 65$ years) of older adults visiting the geriatrics clinics and prospective cohort (n=117, age $\geq 65$ years) male subjects attending primary care clinic at the Veterans Affairs Boston Healthcare System in the USA | Clinical symptoms of anticholinergic toxic reaction and ARS score                                                                                                                                     | A statistically significantly association between higher ARS scores and increased risk of anticholinergic side effects in older patients was reported.                                                                                                                                                                                                                                                                                                                                                                                                              |
|            | Analyses of data from the population-based Geriatric Multidisciplinary Strategy for the Good Care of the Elderly (GeMS) Study/ 3 years [47] | Participants of the GeMS study, randomly selected individuals aged $\geq 75$ years in Finland (n=621, mean age $81.7 \pm 4.9$ years)                                                                                                                          | SAA, vision, functional capacity, cognition, and mood                                                                                                                                                 | The ARS, ADS and Chew list were used in this study. The ARS covered 5% of drugs used by participants compared to 88% and 55% covered by ADS and Chew's list respectively. The ARS and ADS were not significantly associated with SAA results. Anticholinergic burden measured using the 3 scales was inversely associated with short-distance vision, activities of daily living and a higher ARS score predicted 3-month mortality.                                                                                                                                |
|            | Retrospective, longitudinal cohort study / 6 years [56]                                                                                     | Participants discharged from the convalescence rehabilitation ward at Hitachinaka General Hospital in Japan (n=618, median age 79 years)                                                                                                                      | Onset of aspiration pneumonia (AP)                                                                                                                                                                    | Increased anticholinergic load might be a prediction of AP, an increase in ARS score by 2 points and $\geq 3$ points were correlated with almost 2-fold and $>3$ -fold significant increase risk for AP respectively                                                                                                                                                                                                                                                                                                                                                |
|            | Population-based longitudinal cohort study utilizing data from Taiwan's National Health Insurance Research Database/ 10 years [57]          | Taiwanese population (n= 116043, age $\geq 65$ years)                                                                                                                                                                                                         | Monthly ARS and ACB score over a 10-year period, adverse outcomes (hospitalization, emergency visits, fractures, and dementia)                                                                        | Both ARS and ACB scores increased gradually over the 10-year period, but the changes differed significantly with more pronounced increase with the ACB score. Overall, the cumulative effects of multiple low anticholinergic activity anticholinergics were associated with higher odds of emergency department visits and hospitalization than the effect of a single high anticholinergic activity medication. In clinical practice, the ACB scale performed better than the ARS as an instrument for identifying high-risk patients needing early intervention. |
|            | Prospective cross-sectional study in 2017 [58]                                                                                              | Older adults residing in long-term care facilities in Finland (n=2474, mean age $81.7 \pm 9.2$ years)                                                                                                                                                         | ARS score, nutritional status, and health-related quality of life (HRQoL)                                                                                                                             | Initial analysis revealed an association between ARS score and HRQoL, this relationship disappeared after stratification by dementia, dependency, and nutritional status.                                                                                                                                                                                                                                                                                                                                                                                           |
|            | Retrospective, observational study/ 4 years [59]                                                                                            | Older adults admitted to the emergency department at a university hospital in England (n=33360, mean age $78.9 \pm 8.5$ years)                                                                                                                                | Death within 30 days of admission, death within 30 days of discharge, Prolonged length of hospital stay ( $\geq 10$ days), hospital readmission within 30 days, discharge to usual place of residence | Strong associations were found between ARS score 1 and increased odds of inpatient mortality, post-discharge mortality, and lower odds of discharge to usual residence, compared to no anticholinergic medications. A weaker association was also observed with ARS scores $\geq 2$ . A higher ARS scores also had increased odds of 30-day post-discharge readmission. No associations with prolonged hospital stay were reported.                                                                                                                                 |

Running head: Quantifying Anticholinergic Burden and Sedative Load

|                  |                                                                                                                                                                           |                                                                                                                                                                                      |                                                                                                                                   |                                                                                                                                                                                                                                                                                                          |
|------------------|---------------------------------------------------------------------------------------------------------------------------------------------------------------------------|--------------------------------------------------------------------------------------------------------------------------------------------------------------------------------------|-----------------------------------------------------------------------------------------------------------------------------------|----------------------------------------------------------------------------------------------------------------------------------------------------------------------------------------------------------------------------------------------------------------------------------------------------------|
|                  | Retrospective and longitudinal analysis of the criteria to assess appropriate medication use among elderly Complex Patients (CRIME) project/ 1-year follow-up [60]        | Older hospitalized adults enrolled in seven acute care wards in Italy (n=1123, mean age 81 ± 7.5 years)                                                                              | Cognitive function, activities of daily living, ARS and ACB scores                                                                | The ARS and ACB are moderately correlated. Adults with ARS S of ≥1 at discharge had significantly lower cognitive function score at baseline and a steeped cognitive decline during follow-up. Adults with an ACB of ≥1 at discharge had an almost 3-fold increased risk of developing disability.       |
|                  | Prospective study/ 5 months [61]                                                                                                                                          | Older adults admitted to 2 acute geriatric units in the UK (n=362, mean age 83.6 ± 6.6 years)                                                                                        | The Barthel Index (BI) for activities of daily living and ARS score                                                               | The ARS score was strongly associated with decreased physical function in older hospitalized adults and predicted in-hospital mortality in the case of hyponatremia.                                                                                                                                     |
| <b>ABC</b>       | Longitudinal cohort study/ 2 years [7]                                                                                                                                    | Participants with no dementia at recruitment from 63 randomly selected general practitioners in France (n=372, mean age 77.8 ± 7.7 years)                                            | Cognitive performance, mild cognitive impairment, dementia, and anticholinergic burden                                            | The use of anticholinergic drug was a strong predictor of mild cognitive impairment, but no effect on overall dementia rates at 8-year follow-up.                                                                                                                                                        |
|                  | Pharmacoepidemiological population-based study using data from two large datasets in 2011 and 2012 [62]                                                                   | Population aged 65 and older in New Zealand (n = 537387, mean age 74.7 ± 7.6 years)                                                                                                  | Morbidity, mortality, hospital length of stay, institutionalization, functional and cognitive decline, and anticholinergic burden | Anticholinergic burden exposure was measured using 9 different scales. The highest exposure was identified using the ADS and lowest exposure identified using the ABC scale.                                                                                                                             |
| <b>AAS</b>       | Longitudinal prospective community-based prevalence study/ 8 years [12]                                                                                                   | Patients diagnosed with Parkinson's disease on January 2003 in Norway (n=235, mean age 74.7 ± 8.4)                                                                                   | Cognitive function, anticholinergic load using the AAS                                                                            | This study showed a significant association between anticholinergic medications use and the rate of cognitive decline. Patients who used anticholinergics reported a 6.5 times higher decline rate compared to non-users.                                                                                |
|                  | Cross-sectional findings study from the Northern Finland Birth Cohort 1966 (NFBC1966) [63])                                                                               | Individuals from the NFBC1966 who participated in a voluntary 46-year follow-up study recruited between 2012-2013 with complete dental status in Finland (n=1945, mean age 46 years) | Anticholinergic burden, oral hygiene practices and oral hygiene status                                                            | Anticholinergic burden was measured using 9 different scales. Overall, a higher likelihood of having more teeth with dental plaque was reported in participants with anticholinergic burden. The AAS, Chew's scale and ACB showed the strongest association with the number of teeth with dental plaque. |
|                  | Observational and cross-sectional study utilizing data collected between 2007-2014 by the Registry of Dementia of Girona [64]                                             | Patients with incident cases of dementia diagnosed in 7 hospitals in Spain (n=5323, mean age 79.9 ± 7.3 years)                                                                       | Anticholinergic exposure, cognitive function, and dementia score                                                                  | Anticholinergic burden was measured using 9 different scales and a large difference in clinical outcomes among the scales was found. Prevalence of annual anticholinergic exposure was calculated using different scales. The ABC, ARS, and AAS showed the lowest prevalence percentages.                |
| <b>ACL (ALS)</b> | Cross-sectional study utilizing data collected from the multidisciplinary longitudinal Australian Imaging, Biomarkers and Lifestyle (AIBL) study of aging/ 22 months [13] | Healthy controls, patients with mild cognitive impairment and patients with Alzheimer's disease as part of the AIBL in Australia (n=1112, mean age 74.5± 7.7 years)                  | Cognitive performance and ACL score                                                                                               | A high ACL score within the healthy controls had a modest negative impact on cognitive performance in the area of the psychomotor speed and executive function and no impact on other areas of cognition.                                                                                                |

Running head: Quantifying Anticholinergic Burden and Sedative Load

|                      |                                                                                                                                                                                        |                                                                                                                          |                                                                                                                                                     |                                                                                                                                                                                                                                                                                                                                                         |
|----------------------|----------------------------------------------------------------------------------------------------------------------------------------------------------------------------------------|--------------------------------------------------------------------------------------------------------------------------|-----------------------------------------------------------------------------------------------------------------------------------------------------|---------------------------------------------------------------------------------------------------------------------------------------------------------------------------------------------------------------------------------------------------------------------------------------------------------------------------------------------------------|
|                      | Cross-sectional retrospective evaluation study [65]                                                                                                                                    | Outpatients aged 60 and over in Turkey (n=420, mean age 73 ± 8.7 years)                                                  | Polypharmacy and anticholinergic burden scales including ACL                                                                                        | The ACL scale showed moderate correlation with polypharmacy. The highest correlation was found with the drug burden index (DBI) and the lowest was with the AAS.                                                                                                                                                                                        |
|                      | Retrospective analysis study/ 18 months [66]                                                                                                                                           | Hospitalized patients at the long-term care facility in South Korea (n=216, mean age 81.0 ± 6.7 years)                   | Concordance between Beers' criteria and different anticholinergic scales for identifying potentially inappropriate medications and anticholinergics | When the Beers' Criteria 2015 was compared with the different anticholinergic scales for the proportions of anticholinergics identified, the ADS showed the highest concordance followed by the ACL, whereas the lowest concordance was found for AAS.                                                                                                  |
|                      | Longitudinal analysis utilizing data from the UK Biobank community cohort/ 6.2 median follow-up years [67]                                                                             | Participants of the UK biobank, a community-based cohort (502538, mean age 55 years)                                     | All-cause mortality, major adverse cardiovascular event, hospital admission for fall, fracture, dementia, or delirium                               | Anticholinergic burden was calculated at baseline using 10 scales. The ACL identified the greatest number of participants taking medications with anticholinergic properties                                                                                                                                                                            |
| <b>AEC</b>           | Retrospective study utilizing data from the South London and Maudsley National Health Service Foundation Trust (SLaM) Clinical Record Interactive Search (CRIS) resource/ 9 years [15] | Patients with a first diagnosis of dementia in the UK (n=14093, mean age 79.8 ± 10.7 years)                              | Cognitive performance score and AEC score                                                                                                           | Dementia patients with high AEC score appeared to have worse prognosis in terms of hospitalization risk, short-term cognitive function impairment and mortality. No long-term differences in cognitive decline were found.                                                                                                                              |
|                      | Longitudinal analysis utilizing data from the UK Biobank community cohort/ 6.2 median follow-up years [67]                                                                             | Participants of the UK biobank, a community-based cohort (502538, mean age 55 years)                                     | All-cause mortality, major adverse cardiovascular event, hospital admission for fall, fracture, dementia, or delirium                               | Anticholinergic burden was calculated at baseline using 10 scales. The AEC scale showed the greatest association for assessing the risk of neurocognitive complications and a great predictive accuracy for dementia and delirium.                                                                                                                      |
| <b>German ACB</b>    | Multicentered observational cohort study/ 15 months [17]                                                                                                                               | Patients from 8 different primary care centers in Germany (n= 3189, mean age 74.4 ± 5.2 years)                           | Influence of anticholinergic burden on the cognitive function                                                                                       | Anticholinergic burden was measured according to the German ACB and ADS scales. Patients used 2750 and 1764 anticholinergic drugs according to the German ACB and ADS respectively. An increasing German ACB and ADS and was associated with reduced cognitive function. The German ACB generated comparable outcomes in this study with the ADS score. |
| <b>Brazilian ACB</b> | <b>No validation studies available</b>                                                                                                                                                 |                                                                                                                          |                                                                                                                                                     |                                                                                                                                                                                                                                                                                                                                                         |
| <b>Korean ACB</b>    | Single-center retrospective descriptive study/ 8 months [68]                                                                                                                           | Patients visiting the nephrology clinic at Seoul National University Hospital in Korea (n=95, mean age 74.9 ± 7.3 years) | Change in Quality of Medication Use and anticholinergic burden                                                                                      | Pharmacist-led geriatric medication management service significantly decreased patient's anticholinergic burden measured using KABS and improved the quality of medication use in this population.                                                                                                                                                      |



Running head: Quantifying Anticholinergic Burden and Sedative Load

|                            |                                                                                                                                                          |                                                                                                                                                                           |                                                                                                                                                                              |                                                                                                                                                                                                                                                                                                              |
|----------------------------|----------------------------------------------------------------------------------------------------------------------------------------------------------|---------------------------------------------------------------------------------------------------------------------------------------------------------------------------|------------------------------------------------------------------------------------------------------------------------------------------------------------------------------|--------------------------------------------------------------------------------------------------------------------------------------------------------------------------------------------------------------------------------------------------------------------------------------------------------------|
|                            | Nested case-control study utilizing national claims data for validation KABS/ 6 months [69]                                                              | Older adult patient sample dataset provided by the health insurance review and assessment services in Korea (n=461,034, mean age 76.1 ± 7.1 years)                        | Associations between high anticholinergic burden, measured with the KABS, and emergency visits related to anticholinergic adverse events compared to ARS, ACB and ADS scales | Using KABS in older Korean adults for the measurement of anticholinergic burden is superior to the ARS, ACB and ADS for identifying patients with high anticholinergic burden with a stronger dose-response relationship for individual anticholinergic adverse effect and anticholinergic emergency visits. |
|                            | Retrospective case-control study/ 9 years [70]                                                                                                           | Older adults diagnosed with dementia in 2012-2013 were selected from the Korea National Health Insurance Service Senior Cohort database (n=86,576, mean age 79 ± 4 years) | Average daily anticholinergic burden score measured using KABS and ACB for the last 9 years prior to dementia onset                                                          | Patients with high exposure according to KABS and ACB had a significantly higher risk for incident dementia and a dose response relationship was confirmed for the cumulative anticholinergic burden measured using KABS with incident dementia.                                                             |
| <b>mACB</b>                | Quasi-Experimental Study/ 2 years (PREPRINT) [21]                                                                                                        | Patients with dementia and older adults with memory problem or confusion visiting two hospitals in New South Wales, Australia (n=628, mean age 84 ± 8 years)              | The effect of medication safety interventions on potentially inappropriate medications, polypharmacy, and anticholinergic burden scores                                      | The study was completed, and the results are still under peer-review.                                                                                                                                                                                                                                        |
| <b>Sedative Load Model</b> | Analysis study utilizing data from the Geriatric Multidisciplinary Strategy for the Good Care of the Elderly (GeMS), a randomized comparative study [71] | Community-dwelling older adults living in Finland (n= 700, mean age 81.4 ± 4.4 years)                                                                                     | Sedative load using the SLM, instrumental activities of daily living (IADL), depressive symptoms                                                                             | Cumulative sedative load was associated with female sex, poor overall health status, impaired IADL, and loneliness.                                                                                                                                                                                          |
|                            | Cross-sectional study [71]                                                                                                                               | Residents of 53 long-term care wards in Finland (n= 1052, mean age 80 years)                                                                                              | Sedative load using the SLM, dementia, cognitive performance, and comorbidity                                                                                                | Dementia patients were less frequent users of sedatives and hypnotics compared to non-dementia patients. Importantly, both groups had a similar sedative load indicating the use of medications not prescribed for intentional sedation.                                                                     |
|                            | Analysis study using data from the EVIDEM-End of Life (EOL) prospective study / 2 years [72]                                                             | Older adults with dementia living in residential care homes in the UK (n=133, mean age 85.8 ± 6.8 years)                                                                  | Sedative load using the SLM                                                                                                                                                  | One or more psychotropic medication(s) was used by more than 66% of residents. Throughout the study duration, administration of SLM category 2 medications outweighed SLM category 1 drugs                                                                                                                   |
|                            | Multicenter prospective cohort study/ 2 years [73]                                                                                                       | Older hospitalized adults in France (n=315, mean age 87 years)                                                                                                            | SLM, DBI, ADS, risk of falling, comorbidities, level of autonomy, cognitive functions, and physical and physiological health status                                          | More than 56 % of patients included in this study had a SLM >0. No association was found between the SLM, ADS and DBI scores and risk of a falls.                                                                                                                                                            |

Running head: Quantifying Anticholinergic Burden and Sedative Load

|                                                                                                                                                                                |                                                                                                                                             |                                                                                                                                                                                               |                                                                                                                                                                                                                                                                                                                                                                                 |
|--------------------------------------------------------------------------------------------------------------------------------------------------------------------------------|---------------------------------------------------------------------------------------------------------------------------------------------|-----------------------------------------------------------------------------------------------------------------------------------------------------------------------------------------------|---------------------------------------------------------------------------------------------------------------------------------------------------------------------------------------------------------------------------------------------------------------------------------------------------------------------------------------------------------------------------------|
| <p>Retrospective cohort and cross-sectional analysis utilizing the Registry of Senior Australians National Historical Cohort / 8 years [74]</p>                                | <p>Older adults with a diagnosis of dementia using government-subsidized aged care in Australia (n = 373695, mean age 84.1 ± 6.9 years)</p> | <p>Four clinical quality indications: Sedative load using the SLM, dispensing of antipsychotics, dispensing of anti-dementia medications, dementia, and delirium-related hospitalizations</p> | <p>Among aged care users with dementia, a minimal change in the incidence rate of the four indicators of dementia care quality over five years was found.</p>                                                                                                                                                                                                                   |
| <p>Analysis study utilizing data from NILVAD Study, an investigator-led phase III trial of the antihypertensive nilvadipine in mild-moderate Alzheimer's disease (AD) [75]</p> | <p>Community-dwelling older adults with mild-to-moderate AD from 23 different sites in Europe (n=510, mean age 72.8 ± 8.3 years)</p>        | <p>Sedative load using the SLM and adverse events, unscheduled healthcare utilization, delirium, and falls</p>                                                                                | <p>More than 55% of patients with mild-moderate AD were prescribed a regular SLM group 1 and 2 medications and around 22% of patients with SLM ≥3. Increased baseline SLM was associated with incidents of adverse events, unscheduled general practitioner visits and likelihood of incident delirium. No association between SLM and cognitive decline or AD progression.</p> |
| <p><b>Sloane Model</b></p>                                                                                                                                                     | <p><b>No validation studies available using Sloane sedative model. Few studies validated the Sloane analgesic model [26, 27]</b></p>        |                                                                                                                                                                                               |                                                                                                                                                                                                                                                                                                                                                                                 |

Supplementary Figure S1 Drug count between each pair of anticholinergic scales

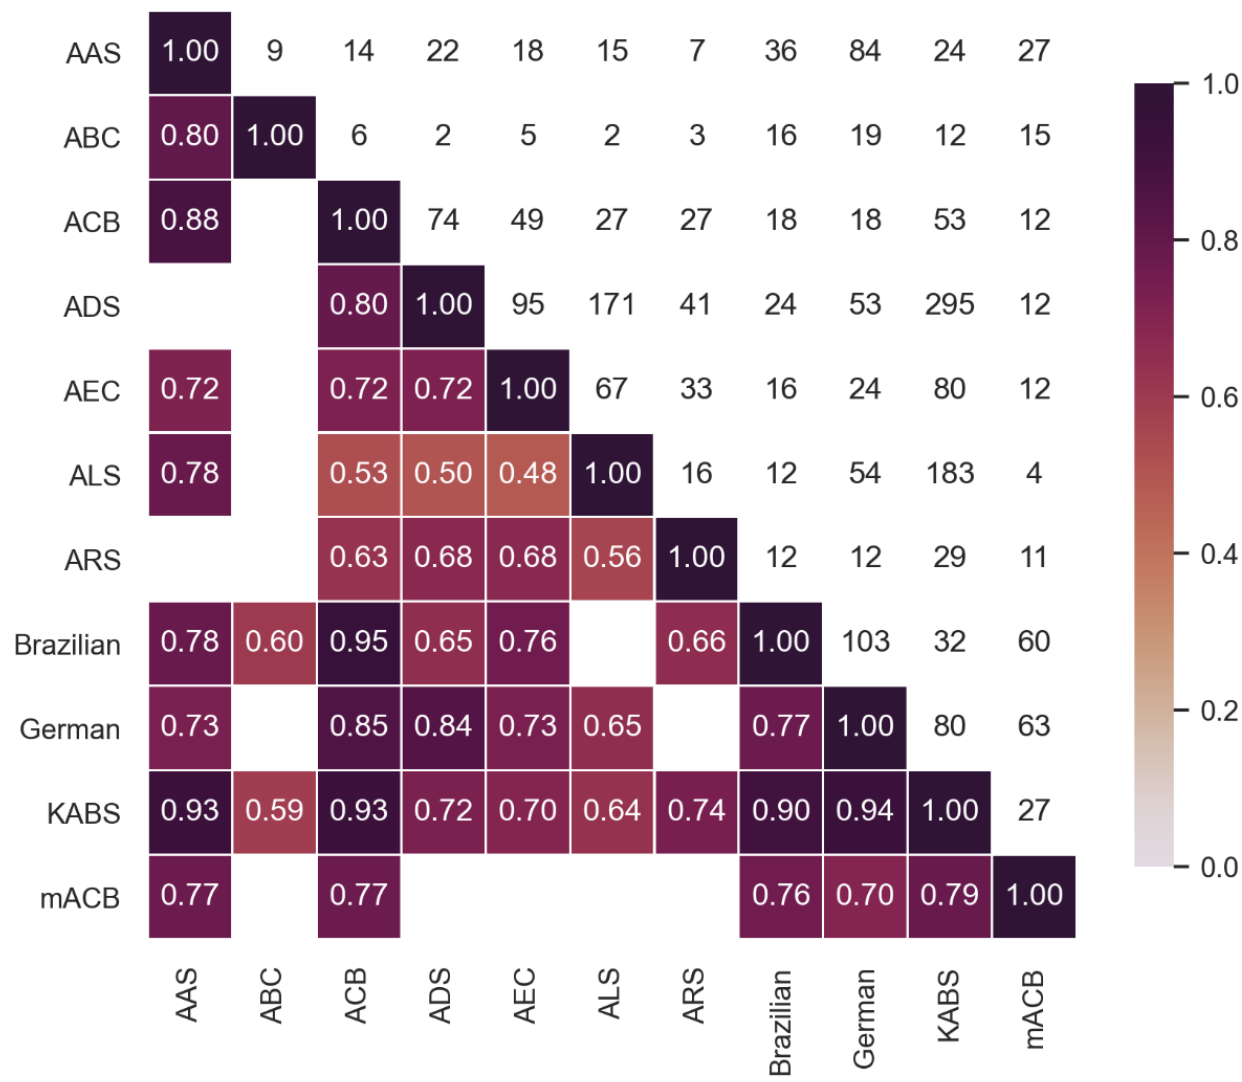

**Key:** ADS: Anticholinergic Drug Scale; ABC: Anticholinergic Burden Classification; ARS: Anticholinergic Rating Scale; ACB: Anticholinergic Cognitive Burden; AAS: Anticholinergic Activity Scale; ALS: Anticholinergic Load Scale; AEC: Anticholinergic Effect on Cognition, KABS: Korean Anticholinergic Burden Scale, mACB: modified Anticholinergic Cognitive Burden scale.  
**Legend** Heatmap showing Spearman's rank correlation coefficient and number of drugs in common between scores for medications common to each pair of scales.

**References:**

1. Han L, McCusker J, Cole M, Abrahamowicz M, Primeau F, Elie M. Use of medications with anticholinergic effect predicts clinical severity of delirium symptoms in older medical inpatients. *Arch Intern Med.* 2001 Apr 23;161(8):1099-105.
2. Carnahan RM, Lund BC, Perry PJ, Pollock BG, Culp KR. The Anticholinergic Drug Scale as a measure of drug-related anticholinergic burden: associations with serum anticholinergic activity. *J Clin Pharmacol.* 2006 Dec;46(12):1481-6.
3. MS, Duffull SB, Nishtala PS. Anticholinergic burden quantified by anticholinergic risk scales and adverse outcomes in older people: a systematic review. *BMC Geriatrics.* 2015 2015/03/25;15(1):31.
4. Kersten HM, E.; Willumsen, T.; Engedal, K.; Bruun Wyller, T.; . Higher anticholinergic drug scale (ADS) scores are associated with peripheral but not cognitive markers of cholinergic blockade. Cross sectional data from 21 Norwegian nursing homes. *British Journal of Clinical Pharmacology.* 2013;75(3):842-9.
5. Amoros-Reboredo P, Soy D, Hernandez-Hernandez M, Lens S, Mestres C. Anticholinergic Burden and Safety Outcomes in Older Patients with Chronic Hepatitis C: A Retrospective Cohort Study. *Int J Environ Res Public Health.* 2020;17(11):3776.
6. Sevilla-Sánchez D, Molist-Brunet N, González-Bueno J, Solà-Bonada N, Espauella-Panicot J, Codina-Jané C. Prevalence, risk factors and adverse outcomes of anticholinergic burden in patients with advanced chronic conditions at hospital admission. *Geriatr Gerontol Int.* 2018 Aug;18(8):1159-65.
7. Ancelin ML, Artero S, Portet F, Dupuy AM, Touchon J, Ritchie K. Non-degenerative mild cognitive impairment in elderly people and use of anticholinergic drugs: longitudinal cohort study. *Bmj.* 2006 Feb 25;332(7539):455-9.
8. Rudolph JL, Salow MJ, Angelini MC, McGlinchey RE. The anticholinergic risk scale and anticholinergic adverse effects in older persons. *Arch Intern Med.* 2008 Mar 10;168(5):508-13.
9. Lozano-Ortega G, Johnston KM, Cheung A, Wagg A, Campbell NL, Dmochowski RR, et al. A review of published anticholinergic scales and measures and their applicability in database analyses. *Archives of Gerontology and Geriatrics.* 2020 2020/03/01;/87:103885.
10. Boustani M, Campbell N, Munger S, Maidment I, Fox C. Impact of anticholinergics on the aging brain: a review and practical application. *Aging Health.* 2008 2008/06/01;4(3):311-20.
11. Chew ML, Mulsant BH, Pollock BG, Lehman ME, Greenspan A, Mahmoud RA, et al. Anticholinergic activity of 107 medications commonly used by older adults. *J Am Geriatr Soc.* 2008 Jul;56(7):1333-41.
12. Ehrt U, Broich K, Larsen JP, Ballard C, Aarsland D. Use of drugs with anticholinergic effect and impact on cognition in Parkinson's disease: a cohort study. *J Neurol Neurosurg Psychiatry.* 2010 Feb;81(2):160-5.
13. Sittironnarit G, Ames D, Bush AI, Faux N, Flicker L, Foster J, et al. Effects of anticholinergic drugs on cognitive function in older Australians: results from the AIBL study. *Dement Geriatr Cogn Disord.* 2011;31(3):173-8.
14. Bishara D, Harwood D, Sauer J, Taylor DM. Anticholinergic effect on cognition (AEC) of drugs commonly used in older people. *International Journal of Geriatric Psychiatry.* 2017;32(6):650-6.
15. Bishara D, Perera G, Harwood D, Taylor D, Sauer J, Stewart R, et al. The Anticholinergic Effect on Cognition (AEC) Scale-Associations with Mortality, Hospitalisation and Cognitive Decline Following Dementia Diagnosis. *International Journal of Geriatric Psychiatry.* 2020.
16. Kiesel EK, Hopf YM, Drey M. An anticholinergic burden score for German prescribers: score development. *BMC Geriatr.* 2018 Oct 11;18(1):239.
17. Krüger C, Schäfer I, van den Bussche H, Bickel H, Fuchs A, Gensichen J, et al. Anticholinergic drug burden according to the anticholinergic drug scale and the German anticholinergic burden and their impact on cognitive function in multimorbid elderly German people: a multicentre observational study. *BMJ Open.* 2021 Mar 23;11(3):e044230.

18. Nery RT, Reis AMM. Development of a Brazilian anticholinergic activity drug scale. *Einstein (Sao Paulo)*. 2019;17(2):eAO4435-eAO.
19. Jun K, Hwang S, Ah YM, Suh Y, Lee JY. Development of an Anticholinergic Burden Scale specific for Korean older adults. *Geriatr Gerontol Int*. 2019 Jul;19(7):628-34.
20. Kable A, Fullerton A, Fraser S, Palazzi K, Hullick C, Oldmeadow C, et al. Comparison of Potentially Inappropriate Medications for People with Dementia at Admission and Discharge during An Unplanned Admission to Hospital: Results from the SMS Dementia Study. *Healthcare (Basel)*. 2019;7(1):8.
21. Kable A, Fraser S, Fullerton A, Hullick C, Palazzi K, Oldmeadow C, et al. Evaluation of the Effect of an Intervention on Potentially Inappropriate Medications (PIMS), Polypharmacy and Anticholinergic Burden Scores for People with Dementia; Results from the SMS Dementia Study†: A Quasi-Experimental Study. *Research Square*; 2020.
22. Linjakumpu T, Hartikainen S, Klaukka T, Koponen H, Kivelä SL, Isoaho R. A model to classify the sedative load of drugs. *Int J Geriatr Psychiatry*. 2003 Jun;18(6):542-4.
23. Taipale HT, Hartikainen S, Bell JS. A comparison of four methods to quantify the cumulative effect of taking multiple drugs with sedative properties. *Am J Geriatr Pharmacother*. 2010 Oct;8(5):460-71.
24. Linjakumpu TA, Hartikainen SA, Klaukka TJ, Koponen HJ, Hakko HH, Viilo KM, et al. Sedative drug use in the home-dwelling elderly. *Ann Pharmacother*. 2004 Dec;38(12):2017-22.
25. Sloane P, Ivey J, Roth M, Roederer M, Williams CS. Accounting for the sedative and analgesic effects of medication changes during patient participation in clinical research studies: measurement development and application to a sample of institutionalized geriatric patients. *Contemp Clin Trials*. 2008 Mar;29(2):140-8.
26. Tan EC, Visvanathan R, Hilmer SN, Vitry A, Emery T, Robson L, et al. Analgesic use and pain in residents with and without dementia in aged care facilities: A cross-sectional study. *Australasian Journal on Ageing*. 2016;35(3):180-7.
27. Tan ECK, Visvanathan R, Hilmer SN, Vitry AI, Quirke T, Emery T, et al. Analgesic use, pain and daytime sedation in people with and without dementia in aged care facilities: a cross-sectional, multisite, epidemiological study protocol. *BMJ Open*. 2014;4(6):e005757.
28. Hunt JN, Lallemand RC. Sedative properties of simple analgesics. *Br J Pharmacol*. 1969;37(2):450-8.
29. Han L, Agostini JV, Allore HG. Cumulative anticholinergic exposure is associated with poor memory and executive function in older men. *J Am Geriatr Soc*. 2008 Dec;56(12):2203-10.
30. Koyama A, Steinman M, Ensrud K, Hillier TA, Yaffe K. Long-term cognitive and functional effects of potentially inappropriate medications in older women. *J Gerontol A Biol Sci Med Sci*. 2014 Apr;69(4):423-9.
31. Briet J, Javelot H, Heitzmann E, Weiner L, Lameira C, D'Athis P, et al. The anticholinergic impregnation scale: Towards the elaboration of a scale adapted to prescriptions in French psychiatric settings. *Therapie*. 2017 Sep;72(4):427-37.
32. Puustinen J, Nurminen J, Vahlberg T, Lyles A, Isoaho R, Rähä I, et al. CNS medications as predictors of precipitous cognitive decline in the cognitively disabled aged: a longitudinal population-based study. *Dement Geriatr Cogn Dis Extra*. 2012;2(1):57-68.
33. American Geriatrics Society 2019 Updated AGS Beers Criteria® for Potentially Inappropriate Medication Use in Older Adults. *J Am Geriatr Soc*. 2019 Apr;67(4):674-94.
34. Durán CE, Azermai M, Vander Stichele RH. Systematic review of anticholinergic risk scales in older adults. *European Journal of Clinical Pharmacology*. 2013 2013/07/01;69(7):1485-96.
35. Nishtala PS, Salahudeen MS, Hilmer SN. Anticholinergics: theoretical and clinical overview. *Expert Opin Drug Saf*. 2016 Jun;15(6):753-68.

36. Hilmer SN, Mager DE, Simonsick EM, Ling SM, Windham BG, Harris TB, et al. Drug burden index score and functional decline in older people. *Am J Med.* 2009 Dec;122(12):1142-9 e1-2.
37. Takahashi H, Ishida-Yamamoto A, Iizuka H. Effects of bepotastine, cetirizine, fexofenadine, and olopatadine on histamine-induced wheal-and flare-response, sedation, and psychomotor performance. *Clinical and Experimental Dermatology.* 2004;29(5):526-32.
38. Koyama Y, Andoh T, Kamiya Y, Miyazaki T, Maruyama K, Kariya T, et al. Bumetanide, an Inhibitor of NKCC1 (Na-K-2Cl Cotransporter Isoform 1), Enhances Propofol-Induced Loss of Righting Reflex but Not Its Immobilizing Actions in Neonatal Rats. *PloS one.* 2016;11(10):e0164125-e.
39. Andrade C. Desvenlafaxine. *Indian J Psychiatry.* 2009 Oct-Dec;51(4):320-3.
40. Klamer TT, Wauters M, Azermai M, Durán C, Christiaens T, Elseviers M, et al. A Novel Scale Linking Potency and Dosage to Estimate Anticholinergic Exposure in Older Adults: the Muscarinic Acetylcholinergic Receptor ANTagonist Exposure Scale. *Basic & Clinical Pharmacology & Toxicology.* 2017;120(6):582-90.
41. Errington AC, Coyne L, Stöhr T, Selve N, Lees G. Seeking a mechanism of action for the novel anticonvulsant lacosamide. *Neuropharmacology.* 2006 2006/06/01;50(8):1016-29.
42. Greenberg WM, Citrome L. Pharmacokinetics and Pharmacodynamics of Lurasidone Hydrochloride, a Second-Generation Antipsychotic: A Systematic Review of the Published Literature. *Clin Pharmacokinet.* 2017 May;56(5):493-503.
43. Speich R, Haller A. Central anticholinergic syndrome with the antimalarial drug mefloquine. *N Engl J Med.* 1994 Jul 7;331(1):57-8.
44. Andersen F, Viitanen M, Halvorsen DS, Straume B, Engstad TA. Co-morbidity and drug treatment in Alzheimer's disease. A cross sectional study of participants in the dementia study in northern Norway. *BMC Geriatr.* 2011;11:58-.
45. Mate KE, Kerr KP, Pond D, Williams EJ, Marley J, Disler P, et al. Impact of multiple low-level anticholinergic medications on anticholinergic load of community-dwelling elderly with and without dementia. *Drugs Aging.* 2015 Feb;32(2):159-67.
46. Pond CD, Brodaty H, Stocks NP, Gunn J, Marley J, Disler P, et al. Ageing in general practice (AGP) trial: a cluster randomised trial to examine the effectiveness of peer education on GP diagnostic assessment and management of dementia. *BMC Family Practice.* 2012 2012/03/07;13(1):12.
47. Lampela P, Lavikainen P, Garcia-Horsman JA, Bell JS, Huupponen R, Hartikainen S. Anticholinergic drug use, serum anticholinergic activity, and adverse drug events among older people: a population-based study. *Drugs Aging.* 2013 May;30(5):321-30.
48. Moga DC, Abner EL, Rigsby DN, Eckmann L, Huffmyer M, Murphy RR, et al. Optimizing medication appropriateness in older adults: a randomized clinical interventional trial to decrease anticholinergic burden. *Alzheimer's Research & Therapy.* 2017 2017/05/23;9(1):36.
49. Pasina L, Colzani L, Cortesi L, Tettamanti M, Zambon A, Nobili A, et al. Relation Between Delirium and Anticholinergic Drug Burden in a Cohort of Hospitalized Older Patients: An Observational Study. *Drugs Aging.* 2019 Jan;36(1):85-91.
50. Lockery JE, Broder JC, Ryan J, Stewart AC, Woods RL, Chong TT, et al. A Cohort Study of Anticholinergic Medication Burden and Incident Dementia and Stroke in Older Adults. *J Gen Intern Med.* 2021 Jun;36(6):1629-37.
51. Fox C, Richardson K, Maidment ID, Savva GM, Matthews FE, Smithard D, et al. Anticholinergic medication use and cognitive impairment in the older population: the medical research council cognitive function and ageing study. *J Am Geriatr Soc.* 2011 Aug;59(8):1477-83.
52. Campbell NL, Boustani MA, Lane KA, Gao S, Hendrie H, Khan BA, et al. Use of anticholinergics and the risk of cognitive impairment in an African American population. *Neurology.* 2010 Jul 13;75(2):152-9.
53. Richardson K, Fox C, Maidment I, Steel N, Loke YK, Arthur A, et al. Anticholinergic drugs and risk of dementia: case-control study. *BMJ (Clinical research ed).* 2018;361:k1315-k.

54. Cross AJ, George J, Woodward MC, Ames D, Brodaty H, Ilomäki J, et al. Potentially Inappropriate Medications and Anticholinergic Burden in Older People Attending Memory Clinics in Australia. *Drugs Aging*. 2016 Jan;33(1):37-44.
55. Vetrano DL, La Carpia D, Grande G, Casucci P, Bacelli T, Bernabei R, et al. Anticholinergic Medication Burden and 5-Year Risk of Hospitalization and Death in Nursing Home Elderly Residents With Coronary Artery Disease. *J Am Med Dir Assoc*. 2016 Nov 1;17(11):1056-9.
56. Kose E, Hirai T, Seki T. Assessment of aspiration pneumonia using the Anticholinergic Risk Scale. *Geriatr Gerontol Int*. 2018 Aug;18(8):1230-5.
57. Hsu WH, Huang ST, Lu WH, Wen YW, Chen LK, Hsiao FY. Impact of Multiple Prescriptions With Anticholinergic Properties on Adverse Clinical Outcomes in the Elderly: A Longitudinal Cohort Study in Taiwan. *Clin Pharmacol Ther*. 2021 Feb 24.
58. Aalto UL, Finne-Soveri H, Kautiainen H, Öhman H, Roitto HM, Pitkälä KH. Relationship between Anticholinergic Burden and Health-Related Quality of Life among Residents in Long-Term Care. *The journal of nutrition, health & aging*. 2021 2021/02/01;25(2):224-9.
59. Herrero-Zazo M, Berry R, Bines E, Bhattacharya D, Myint PK, Keevil VL. Anticholinergic burden in older adult inpatients: patterns from admission to discharge and associations with hospital outcomes. *Ther Adv Drug Saf*. 2021;12:20420986211012592.
60. Brombo G, Bianchi L, Maietti E, Malacarne F, Corsonello A, Cherubini A, et al. Association of Anticholinergic Drug Burden with Cognitive and Functional Decline Over Time in Older Inpatients: Results from the CRIME Project. *Drugs Aging*. 2018 Oct;35(10):917-24.
61. Lowry E, Woodman RJ, Soiza RL, Mangoni AA. Associations between the anticholinergic risk scale score and physical function: potential implications for adverse outcomes in older hospitalized patients. *J Am Med Dir Assoc*. 2011 Oct;12(8):565-72.
62. Salahudeen MS, Hilmer SN, Nishtala PS. Comparison of anticholinergic risk scales and associations with adverse health outcomes in older people. *J Am Geriatr Soc*. 2015 Jan;63(1):85-90.
63. Tiisanoja A, Syrjälä AM, Anttonen V, Ylöstalo P. Anticholinergic burden, oral hygiene practices, and oral hygiene status-cross-sectional findings from the Northern Finland Birth Cohort 1966. *Clin Oral Investig*. 2021 Apr;25(4):1829-37.
64. Turró-Garriga O, Calvó-Perxas L, Vilalta-Franch J, Blanco-Silvente L, Castells X, Capellà D, et al. Measuring anticholinergic exposure in patients with dementia: A comparative study of nine anticholinergic risk scales. *International Journal of Geriatric Psychiatry*. 2018;33(5):710-7.
65. Okudur SK, Dokuzlar O, Aydın AE, Kocyigit SE, Soysal P, Isik AT. The evaluation of relationship between polypharmacy and anticholinergic burden scales. *North Clin Istanb*. 2021;8(2):139-44.
66. Park KH, Yang Y-M, Yoo JC, Choi EJ. Comparative Analysis Of Anticholinergics Prescribed To Elderly Patients At A Korean Long-Term Care Facility According To Beers Criteria 2003, 2012, And 2015 And Anticholinergic-Burden Rating Scales: A Cross-Sectional Retrospective Study. *Clinical interventions in aging*. 2019;14:1963-74.
67. Hanlon P, Quinn TJ, Gallacher KI, Myint PK, Jani BD, Nicholl BI, et al. Assessing Risks of Polypharmacy Involving Medications With Anticholinergic Properties. *The Annals of Family Medicine*. 2020;18(2):148-55.
68. Kim AJ, Lee H, Shin E-J, Cho E-J, Cho YS, Lee H, et al. Pharmacist-Led Collaborative Medication Management for the Elderly with Chronic Kidney Disease and Polypharmacy. *Int J Environ Res Public Health*. 2021;18(8):4370.
69. Hwang S, Chung JE, Jun K, Ah Y-M, Kim K-I, Lee J-Y. Comparative associations between anticholinergic burden and emergency department visits for anticholinergic adverse events in older Korean adults: a nested case-control study using national claims data for validation of a novel country-specific scale. *BMC Pharmacol Toxicol*. 2021;22(1):2-.
70. Suh Y, Ah Y-M, Han E, Jun K, Hwang S, Choi KH, et al. Dose response relationship of cumulative anticholinergic exposure with incident dementia: validation study of Korean anticholinergic burden scale. *BMC Geriatrics*. 2020 2020/07/29;20(1):265.



71. Bell JS, Taipale HT, Soini H, Pitkälä KH. Sedative Load among Long-Term Care Facility Residents with and without Dementia. *Clinical Drug Investigation*. 2010 2010/01/01;30(1):63-70.
72. Parsons C, Haydock J, Mathie E, Baron N, Machen I, Stevenson E, et al. Sedative load of medications prescribed for older people with dementia in care homes. *BMC Geriatrics*. 2011 2011/09/30;11(1):56.
73. Jean-Bart E, Moutet C, Dauphinot V, Krolak-Salmon P, Mouchoux C. Exposure to anticholinergic and sedative medicines as indicators of high-risk prescriptions in the elderly. *Int J Clin Pharm*. 2017 Dec;39(6):1237-47.
74. Cations M, Lang C, Ward SA, Caughey GE, Crotty M, Whitehead C, et al. Using data linkage for national surveillance of clinical quality indicators for dementia care among Australian aged care users. *Sci Rep*. 2021;11(1):10674-.
75. Dyer AH, Murphy C, Lawlor B, Kennelly SP. Sedative Load in Community-Dwelling Older Adults with Mild-Moderate Alzheimer's Disease: Longitudinal Relationships with Adverse Events, Delirium and Falls. *Drugs Aging*. 2020 Nov;37(11):829-37.
